# Supplementary material for: Comparison of the Transcriptomic Signatures in Pediatric and Adult CML
Source: MDPI journal article supplement (doi:10.3390/cancers13246263), 2021-12-14

# Comparison of the Transcriptomic Signatures in Pediatric and Adult CML

Minyoung Youn, Stephanie M. Smith, Alex Gia Lee, Hee-Don Chae, Elizabeth Spiteri, Jason Erdmann, Ilana Galperin, Lara Murphy Jones, Michele Donato, Parveen Abidi, Henrique Bittencourt, Norman Lacayo, Gary Dahl, Catherine Aftandilian, Kara L. Davis, Jairo A. Matthews, Steven M. Kornblau, Min Huang, Nathan Sumarsono, Michele S. Redell, Cecilia H. Fu, I-Ming Chen, Todd A. Alonzo, Elizabeth Eklund, Jason Gotlib, Purvesh Khatri, E. Alejandro Sweet-Cordero, Nobuko Hijiya, and Kathleen M. Sakamoto

## Methods S1:

### FISH

CML CD34+ cells were isolated by magnetic sorting (Miltenyi Biotec, Inc.: Sunnyvale, CA, USA). Sorted cells underwent hypotonic cell expansion and methanol/acetic acid fixation. Slides were prepared, pretreated with 2xSSC, alcohol dehydrated, and hybridized with BCR-ABL t(9;22) dual color, dual fusion translocation probes (Abbott/Vysis). Analysis of 200 interphase nuclei per slide was performed by a fluorescent microscope. Observed signal patterns were tallied and categorized, as per clinical standards.

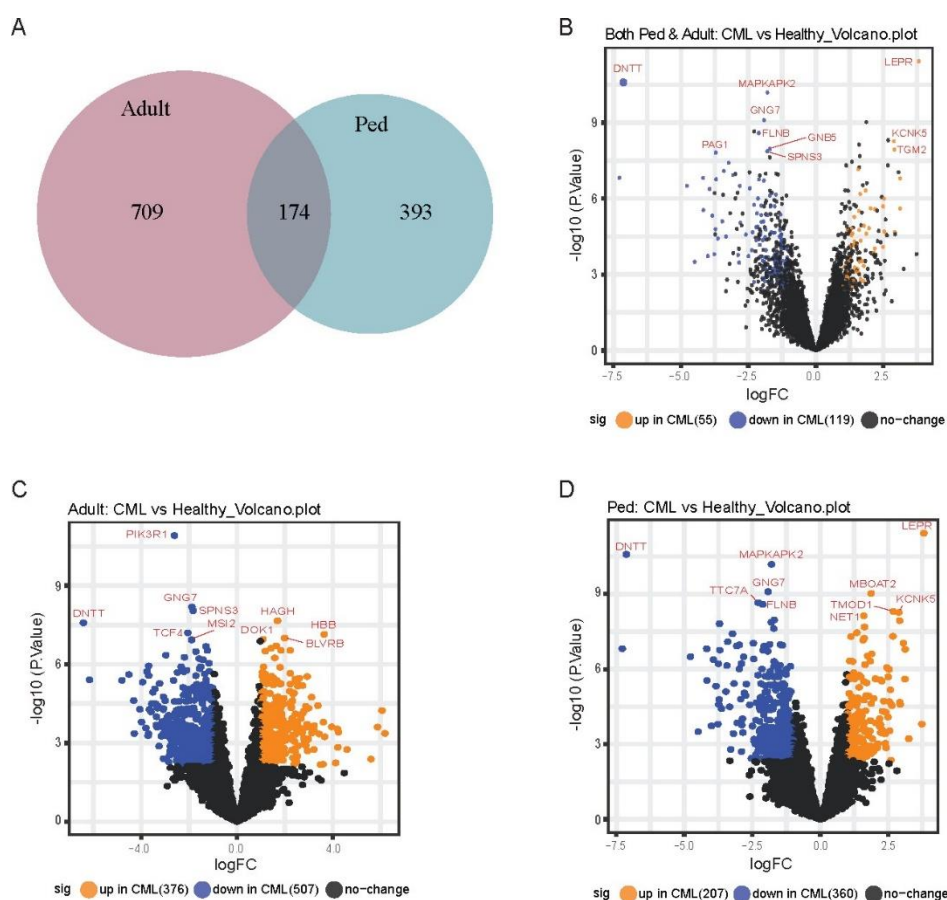

**Figure S1.** Volcano plots show differentially expressed genes in each comparison. (A) Venn diagram with the number of differentially expressed genes (DEG) between CML CD34+ cells and healthy

control CD34+ cells in each age group. DEG defined as FDR of  $\leq 0.05$  and absolute log2 fold-change  $> 1$ . **(B)** Volcano plot with commonly regulated genes in both pediatric and adult CML CD34+ cells. **(C)** Volcano plot with DEG comparing adult CML CD34+ cells vs. adult healthy control CD34+ cells. **(D)** Volcano plot with DEG comparing pediatric CML CD34+ cells vs. pediatric healthy control CD34+ cells.

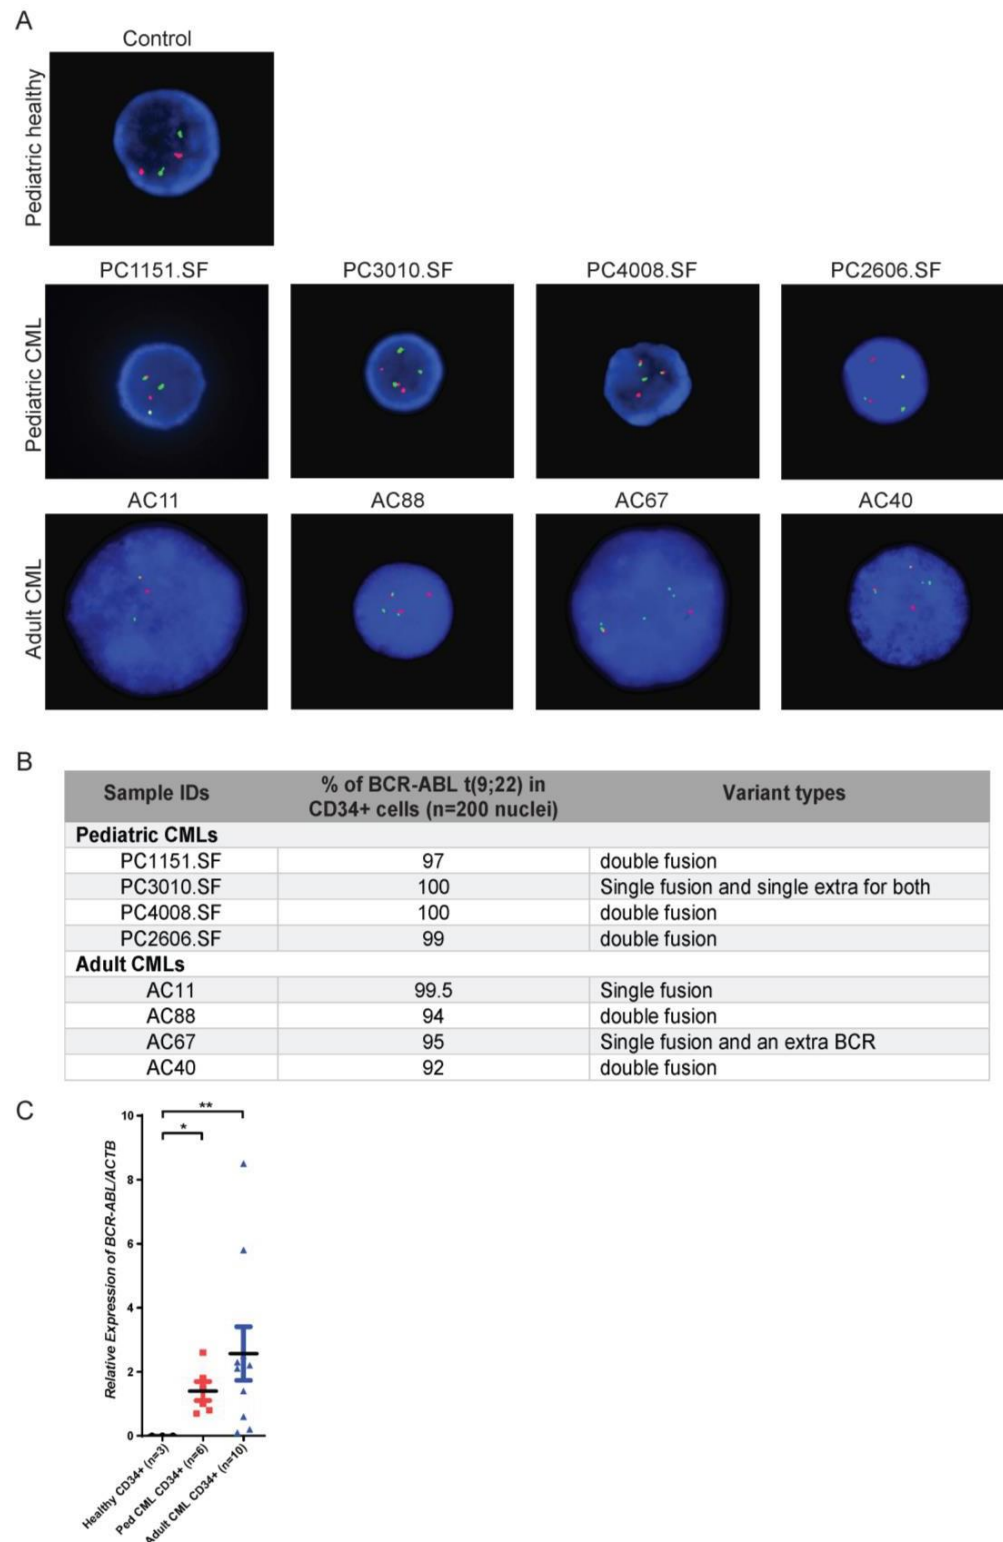

**Figure S2.** BCR-ABL1 fusions were detected in  $\geq 92\%$  of CD34+ cells from both pediatric and adult CML patient samples by FISH analysis. \* Green: BCR, Red: ABL1. **(A)** Representative images of

BCR-ABL+ cells in indicated samples. (B) Percentages of BCR-ABL+ cells in each CML CD34+ sample. (C) BCR-ABL expression was detected by RT-qPCR in CD34+ cells from pediatric and adult patients with CML but not in CD34+ cells from healthy donors.

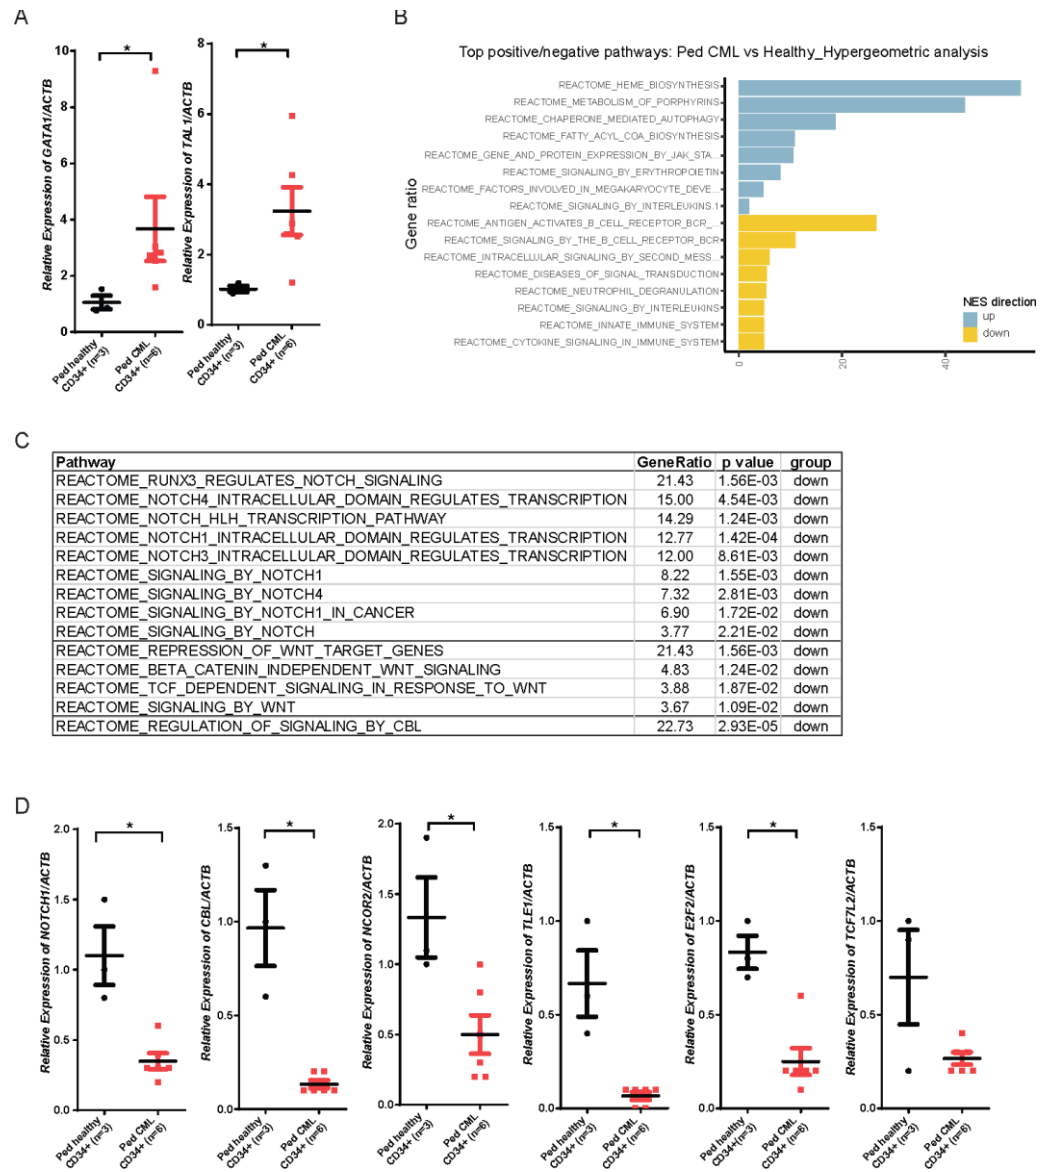

**Figure S3.** Differentially expressed genes and pathways comparing pediatric CML CD34+ cells vs. pediatric healthy control CD34+ cells. (A) GATA1 and TAL1 expression were significantly increased in pediatric CML CD34+ cells compared to pediatric healthy CD34+ cells. (B) Barplot shows top REACTOME pathways in pediatric CML CD34+ cells compared to pediatric healthy CD34+ cells. (C) NOTCH, WNT, and CBL pathways were significantly downregulated in pediatric CML compared to pediatric healthy controls. (D) Several genes involved in NOTCH, WNT, and CBL pathways demonstrate decreased expressions in pediatric CML CD34+ cells compared to pediatric healthy CD34+ cells. Each spot on the graph represents an individual sample. mRNA levels were assessed by RT-qPCR and normalized against *beta-actin* (*ACTB*) expression. \*  $p < 0.05$ .

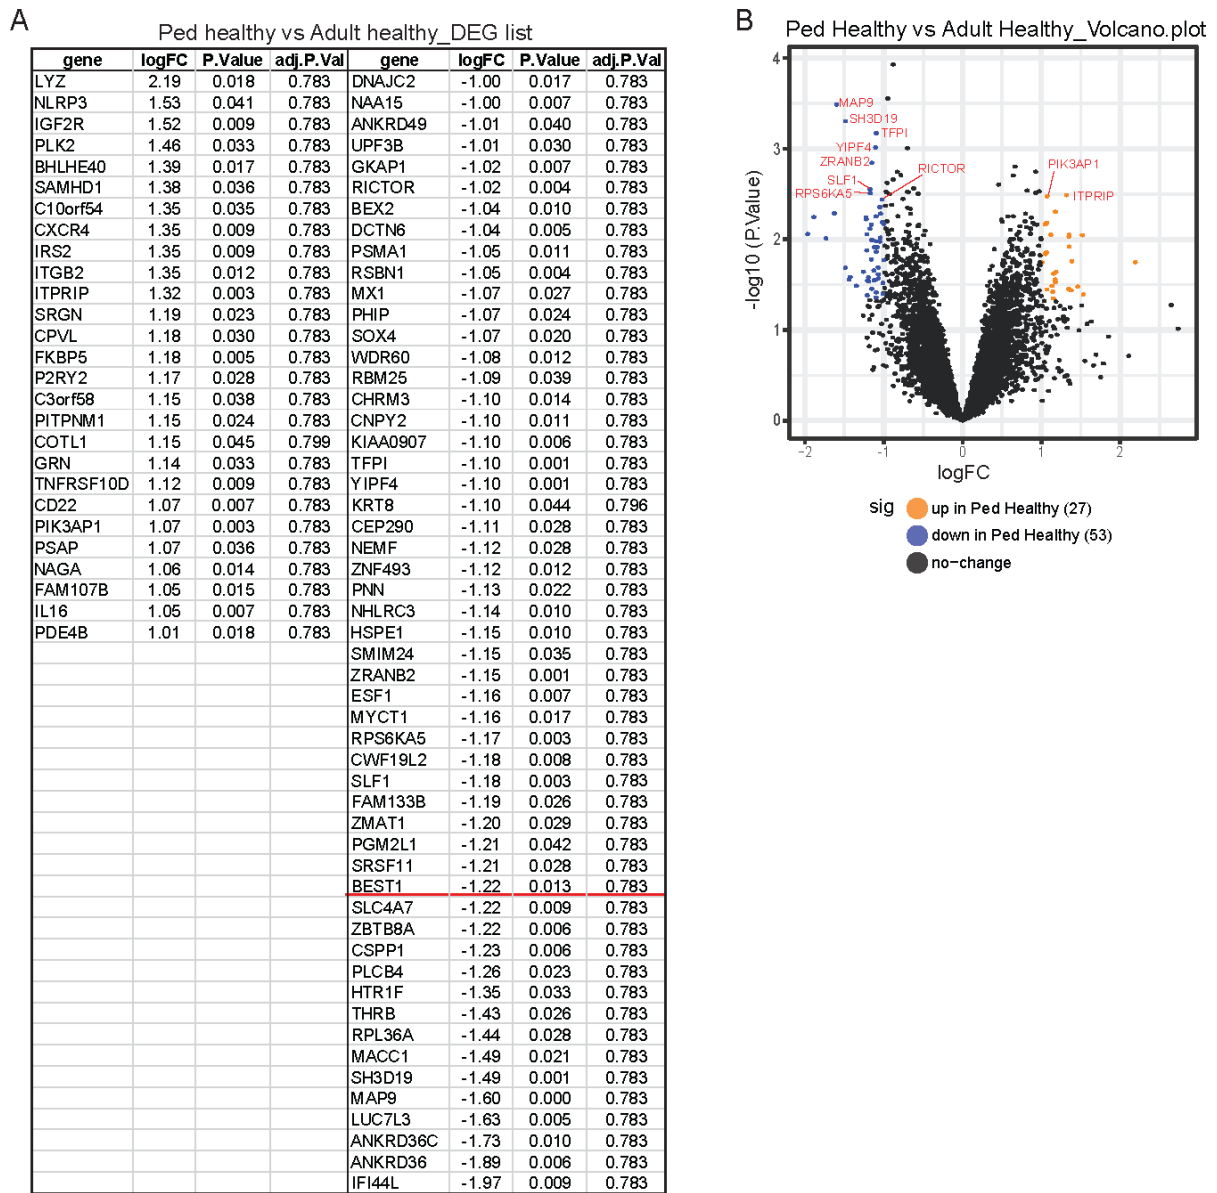

**Figure S4.** Comparison of pediatric healthy and adult healthy CD34+ cells does not show significant differences. (A) Table and (B) Volcano plot show DEG in pediatric and adult healthy controls. DEG defined as FDR of  $\leq 0.8$  and absolute  $\log_2$  fold-change  $> 1$ .

**A** Top positive/negative pathways: (Ped CML vs Ped healthy) vs (adult CML vs adult healthy)\_Hypergeometric analysis

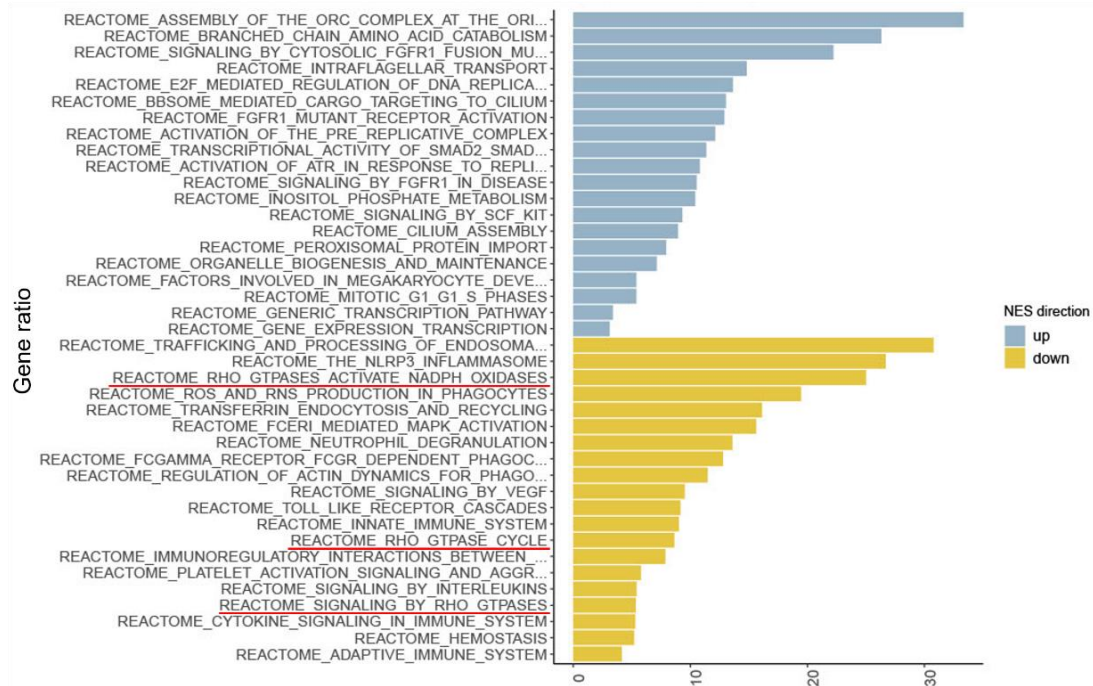

**B** Rho specific pathways: (Ped CML vs Ped healthy) vs (adult CML vs adult healthy)\_Hypergeometric analysis

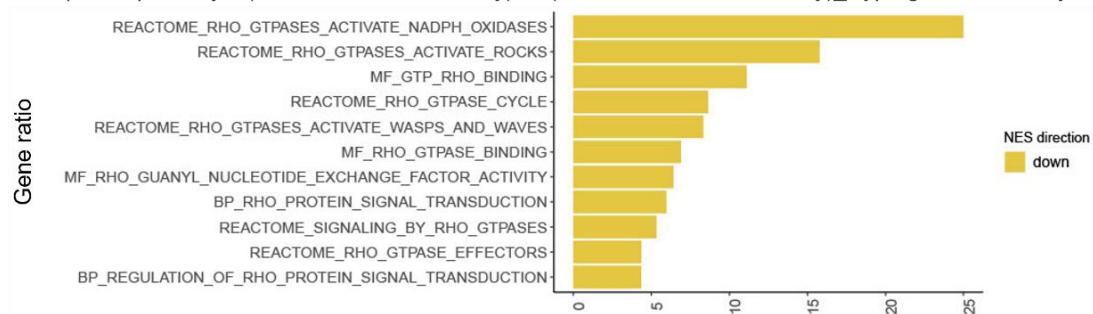

**Figure S5.** Differentially expressed pathways for (pediatric CML vs pediatric healthy) vs (adult CML vs adult healthy). (A) top REACTOME pathways (B) Rho pathways only; MF and BP are GP terms for Molecular Function and Biological Process, respectively.

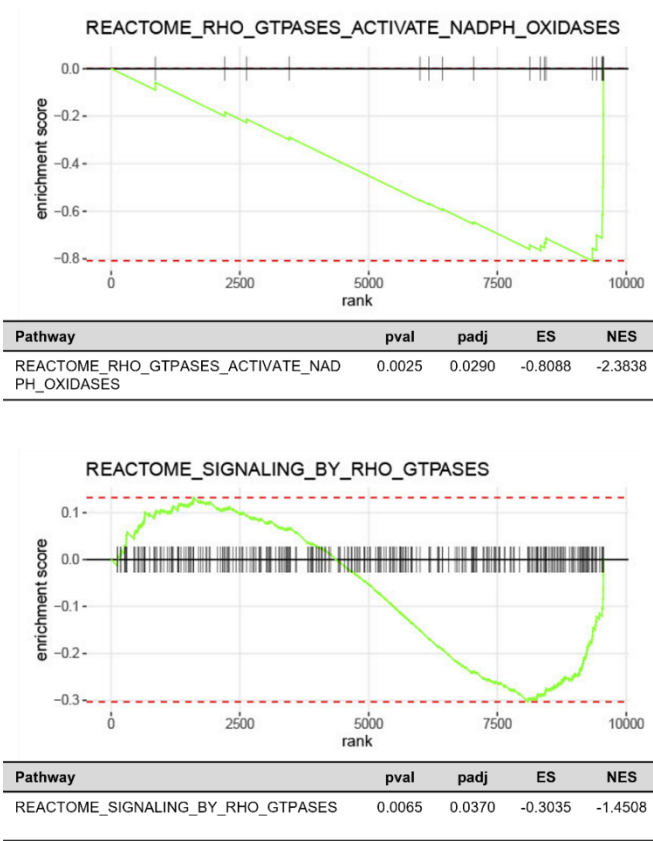

**Figure S6.** GSEA-enrichment plots of Rho pathways between (pediatric CML vs pediatric healthy) vs (adult CML vs adult healthy).

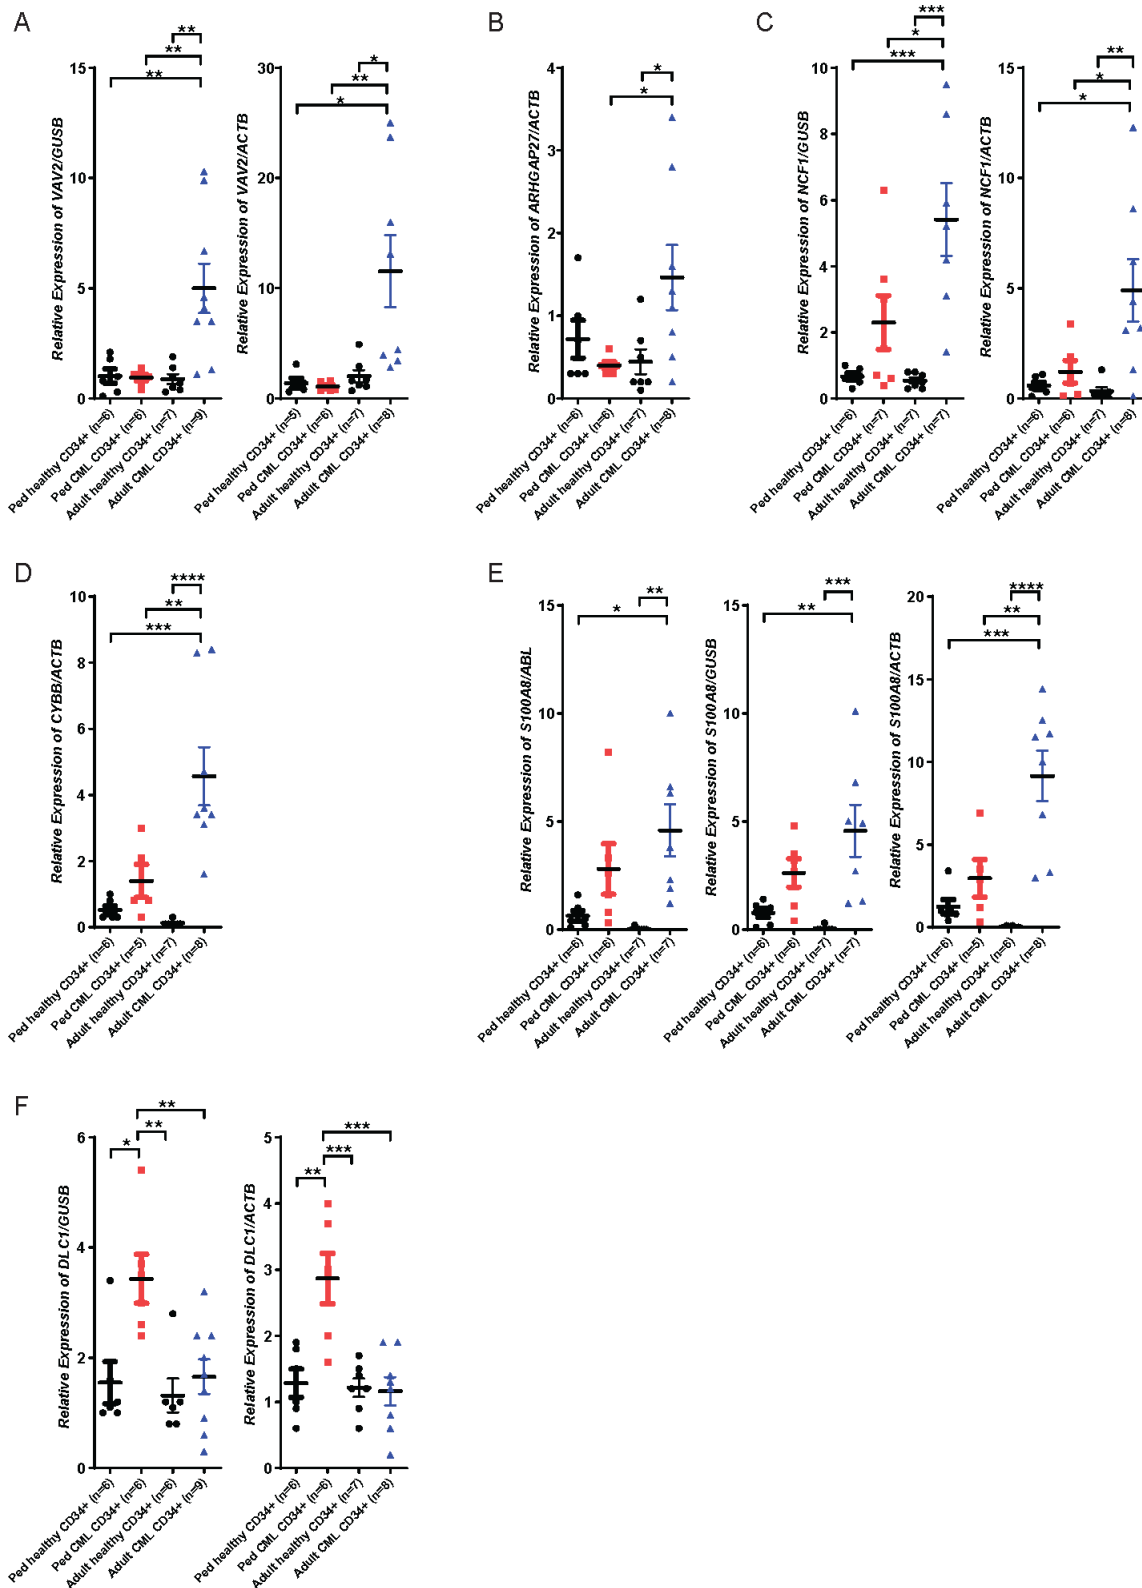

**Figure S7.** Several genes involved in the Rho pathway were differentially expressed between pediatric CML CD34+ cells and adult CML CD34+ cells. (A–F) mRNA expression levels of dysregulated genes were assessed by RT-qPCR and normalized against *Abelson (ABL)*, *beta-glucuronidase (GUSB)*, or *beta-actin (ACTB)* expression. Data were graphed as mean  $\pm$  SEM. Each spot on the graph represents an individual sample.  $p$  values for statistical significance were obtained using unpaired Student t-test or ANOVA test (Tukey's multiple comparison). \*  $p < 0.05$ , \*\*  $p < 0.01$ , \*\*\*  $p < 0.001$ , \*\*\*\*  $p < 0.0001$ .

**Table S1.** Demographic and clinical characteristics of CML patients and healthy controls.

| Sample ID                         | Sex | Age | Race/Ethnicity | CML Phase | WBC Count | Platelet Count | Spleen Size |
|-----------------------------------|-----|-----|----------------|-----------|-----------|----------------|-------------|
| <b>Pediatric CML patients</b>     |     |     |                |           |           |                |             |
| PC1151.SF                         | M   | 13  | Hispanic       | Chronic   | 291       | 626            | 8           |
| PC3010.SF                         | M   | 14  | Asian          | Chronic   | 351       | 617            | 5           |
| PC2606.SF                         | M   | 9   | Other          | Chronic   | 255       | 627            | 2           |
| PC4008.SF                         | M   | 17  | Asian          | Chronic   | 488       | 439            | 5           |
| PC5907.CG                         | M   | 10  | Asian          | Chronic   | 108       | 698            | Unknown     |
| PC6128.CG                         | M   | 10  | Asian          | Chronic   | 95        | 1047           | Unknown     |
| PC8267.CG                         | F   | 11  | Hispanic       | Unknown   | Unknown   | Unknown        | Unknown     |
| PC9495.CG                         | M   | 9   | White          | Unknown   | Unknown   | Unknown        | Unknown     |
| PC2300.SF                         | M   | 5   | White          | Chronic   | 57        | 870            | 0           |
| <b>Adult CML patients</b>         |     |     |                |           |           |                |             |
| AC10.SF                           | M   | 33  | Asian          | Chronic   | 370       | 253            | 17          |
| AC33.SF                           | M   | 55  | White          | Chronic   | 57        | 348            | 0           |
| AC36.SF                           | M   | 62  | White          | Chronic   | 37        | 590            | 0           |
| AC48.SF                           | M   | 23  | Hispanic       | Chronic   | 260       | 134            | 4           |
| AC64.SF                           | F   | 30  | Hispanic       | Chronic   | 273       | 262            | 0           |
| AC40                              | M   | 68  | White          | Chronic   | 64        | 355            | 0           |
| AC82                              | M   | 62  | White          | Chronic   | 136       | 456            | 0           |
| AC11                              | M   | 44  | Black          | Chronic   | 167       | 205            | 0           |
| AC88                              | M   | 62  | White          | Chronic   | 126       | 187            | 0           |
| AC67                              | M   | 53  | White          | Chronic   | 149       | 371            | 0           |
| <b>Pediatric healthy controls</b> |     |     |                |           |           |                |             |
| PN71.UM                           | F   | 12  | Asian          |           |           |                |             |
| PN81.UM                           | M   | 10  | White          |           |           |                |             |
| PN12                              | M   | 19  | Other          |           |           |                |             |
| PN14                              | M   | 19  | Other          |           |           |                |             |
| PN31                              | F   | 19  | Hispanic       |           |           |                |             |
| PN46                              | M   | 19  | Black          |           |           |                |             |
| PN85                              | F   | 18  | Black          |           |           |                |             |
| PN06                              | M   | 19  | Black          |           |           |                |             |
| PN74                              | F   | 19  | White          |           |           |                |             |
| PN18                              | M   | 19  | Black          |           |           |                |             |
| <b>Adult healthy controls</b>     |     |     |                |           |           |                |             |
| AN96                              | M   | 33  | Black          |           |           |                |             |
| AN69                              | M   | 35  | Hispanic       |           |           |                |             |
| AN173                             | M   | 31  | Black          |           |           |                |             |
| AN369                             | F   | 32  | Black          |           |           |                |             |
| AN52                              | M   | 29  | Black          |           |           |                |             |
| AN53                              | M   | 44  | Other          |           |           |                |             |
| AN55                              | M   | 28  | Black          |           |           |                |             |
| AN35.LZ                           | F   | 24  | Unknown        |           |           |                |             |
| AN73.LZ                           | M   | 25  | Black          |           |           |                |             |
| AN62.LZ                           | M   | 21  | Black          |           |           |                |             |

M=male; F=female; Age is reported in years; Spleen size is reported in centimeters below the costal margin.



**Table S2.** All DEG in pediatric CML compared to adult CML, sorted according to logFC level. *p* values were obtained using hypergeometric test.

| Upregulated in Pediatric CML<br>compared to Adult CML |       |                 |                    | Downregulated in Pediatric CML<br>compared to Adult CML |       |                 |                    |
|-------------------------------------------------------|-------|-----------------|--------------------|---------------------------------------------------------|-------|-----------------|--------------------|
| gene                                                  | logFC | <i>p</i> .Value | adj. <i>p</i> .Val | Gene                                                    | logFC | <i>p</i> .Value | adj. <i>p</i> .Val |
| PLOD2                                                 | 3.62  | 5.00E-04        | 1.67E-02           | GRINA                                                   | -1.51 | 2.00E-04        | 1.33E-02           |
| FAM199X                                               | 3.52  | 0.00E+00        | 9.20E-03           | NUDT16                                                  | -1.52 | 1.00E-03        | 2.18E-02           |
| BEND4                                                 | 3.52  | 1.00E-04        | 1.18E-02           | C16orf74                                                | -1.54 | 1.30E-03        | 2.32E-02           |
| CD40LG                                                | 3.41  | 1.00E-04        | 1.17E-02           | FAM50A                                                  | -1.55 | 3.00E-04        | 1.40E-02           |
| PKIA                                                  | 3.32  | 0.00E+00        | 1.05E-02           | IL18BP                                                  | -1.56 | 2.50E-03        | 3.10E-02           |
| OXR1                                                  | 3.28  | 1.00E-04        | 1.11E-02           | CARD16                                                  | -1.57 | 2.30E-03        | 3.02E-02           |
| PEX7                                                  | 3.27  | 1.00E-04        | 1.18E-02           | ZFHX3                                                   | -1.57 | 4.00E-03        | 3.79E-02           |
| NUDCD1                                                | 3.17  | 9.00E-04        | 2.08E-02           | HOOK2                                                   | -1.58 | 0.00E+00        | 9.70E-03           |
| SGPP1                                                 | 3.15  | 1.00E-04        | 1.22E-02           | ADGRE5                                                  | -1.59 | 7.00E-04        | 1.88E-02           |
| NEMP2                                                 | 3.14  | 1.00E-04        | 1.22E-02           | S100A4                                                  | -1.6  | 3.20E-03        | 3.38E-02           |
| MYEF2                                                 | 3.13  | 0.00E+00        | 1.02E-02           | JSRP1                                                   | -1.61 | 1.00E-04        | 1.19E-02           |
| TADA1                                                 | 3.11  | 0.00E+00        | 9.40E-03           | PLEKHO1                                                 | -1.61 | 3.00E-04        | 1.47E-02           |
| WDR44                                                 | 3.09  | 0.00E+00        | 9.70E-03           | IL10RB                                                  | -1.61 | 4.00E-04        | 1.67E-02           |
| FBLN2                                                 | 3.09  | 3.00E-04        | 1.47E-02           | HSPA1A                                                  | -1.61 | 3.10E-03        | 3.35E-02           |
| BMI1                                                  | 3.08  | 3.00E-04        | 1.52E-02           | CACFD1                                                  | -1.62 | 5.00E-04        | 1.67E-02           |
| VANGL2                                                | 3.08  | 6.00E-04        | 1.81E-02           | TSPO                                                    | -1.63 | 1.00E-04        | 1.18E-02           |
| SH3BGRL2                                              | 3.07  | 3.00E-04        | 1.42E-02           | LST1                                                    | -1.63 | 2.50E-03        | 3.13E-02           |
| WFDC1                                                 | 3.04  | 4.00E-04        | 1.58E-02           | SAT2                                                    | -1.64 | 6.00E-04        | 1.82E-02           |
| MYCT1                                                 | 3.02  | 4.00E-04        | 1.64E-02           | CYBA                                                    | -1.65 | 1.00E-04        | 1.22E-02           |
| LYSMD3                                                | 3.01  | 1.00E-04        | 1.22E-02           | APOL1                                                   | -1.65 | 7.00E-04        | 1.91E-02           |
| C5                                                    | 2.9   | 0.00E+00        | 9.90E-03           | HIST1H2BG                                               | -1.65 | 2.70E-03        | 3.18E-02           |
| MBTPS2                                                | 2.9   | 3.00E-04        | 1.42E-02           | LTB4R                                                   | -1.66 | 1.60E-03        | 2.61E-02           |
| ZNF675                                                | 2.88  | 1.00E-04        | 1.22E-02           | S100A6                                                  | -1.66 | 4.20E-03        | 3.86E-02           |
| FNBP1L                                                | 2.87  | 2.00E-04        | 1.29E-02           | BRI3                                                    | -1.67 | 1.20E-03        | 2.29E-02           |
| GALNT12                                               | 2.86  | 4.00E-04        | 1.67E-02           | RXRA                                                    | -1.68 | 7.00E-04        | 1.90E-02           |
| FAM160B1                                              | 2.85  | 7.00E-04        | 1.91E-02           | SULT1A1                                                 | -1.68 | 1.20E-03        | 2.31E-02           |
| TTK                                                   | 2.85  | 1.20E-03        | 2.29E-02           | TCIRG1                                                  | -1.7  | 2.00E-03        | 2.85E-02           |
| ZSCAN12                                               | 2.82  | 2.00E-04        | 1.33E-02           | TRPM2                                                   | -1.7  | 2.00E-03        | 2.88E-02           |
| MYCN                                                  | 2.82  | 1.50E-03        | 2.50E-02           | IL6R                                                    | -1.71 | 1.40E-03        | 2.45E-02           |
| CLDN10                                                | 2.79  | 1.20E-03        | 2.31E-02           | HLA.DMB                                                 | -1.74 | 4.00E-04        | 1.63E-02           |
| SCOC                                                  | 2.77  | 1.00E-04        | 1.22E-02           | AHNAK                                                   | -1.74 | 1.60E-03        | 2.63E-02           |
| FANCF                                                 | 2.77  | 1.10E-03        | 2.25E-02           | IER2                                                    | -1.74 | 3.60E-03        | 3.58E-02           |
| NAA30                                                 | 2.76  | 1.00E-04        | 1.22E-02           | CD72                                                    | -1.74 | 3.60E-03        | 3.59E-02           |
| ZNF776                                                | 2.74  | 2.00E-04        | 1.33E-02           | PTPRE                                                   | -1.74 | 6.00E-03        | 4.70E-02           |
| FKBP14                                                | 2.74  | 4.00E-04        | 1.58E-02           | OPRL1                                                   | -1.74 | 6.50E-03        | 4.88E-02           |
| CEP70                                                 | 2.71  | 1.00E-04        | 1.18E-02           | ANKRD11                                                 | -1.75 | 3.00E-03        | 3.32E-02           |
| ZNF518B                                               | 2.71  | 2.00E-04        | 1.33E-02           | HLA.F                                                   | -1.76 | 5.00E-03        | 4.22E-02           |
| EXTL2                                                 | 2.71  | 5.00E-04        | 1.76E-02           | UNC93B1                                                 | -1.77 | 4.00E-04        | 1.63E-02           |
| RRM2B                                                 | 2.7   | 1.00E-03        | 2.21E-02           | ANXA2                                                   | -1.77 | 3.40E-03        | 3.49E-02           |
| SOCS6                                                 | 2.67  | 1.00E-04        | 1.22E-02           | MYO1F                                                   | -1.78 | 4.00E-04        | 1.58E-02           |
| DNAJC18                                               | 2.67  | 2.00E-04        | 1.23E-02           | MVP                                                     | -1.78 | 6.00E-04        | 1.80E-02           |
| MIER3                                                 | 2.65  | 2.00E-04        | 1.33E-02           | ZDHHC1                                                  | -1.79 | 5.00E-04        | 1.67E-02           |
| IGF2BP2                                               | 2.65  | 5.90E-03        | 4.67E-02           | SH2B2                                                   | -1.79 | 3.30E-03        | 3.45E-02           |
| CEP83                                                 | 2.61  | 2.00E-04        | 1.32E-02           | CTSD                                                    | -1.81 | 6.00E-04        | 1.84E-02           |
| YOD1                                                  | 2.61  | 3.00E-04        | 1.40E-02           | LGALS1                                                  | -1.81 | 2.10E-03        | 2.91E-02           |
| HOXB2                                                 | 2.61  | 7.00E-04        | 1.91E-02           | DUSP2                                                   | -1.81 | 2.80E-03        | 3.21E-02           |
| C12orf66                                              | 2.6   | 6.00E-04        | 1.86E-02           | TNFAIP8L2                                               | -1.83 | 4.00E-04        | 1.64E-02           |
| XPR1                                                  | 2.59  | 3.00E-04        | 1.40E-02           | KLF6                                                    | -1.83 | 7.00E-04        | 1.91E-02           |
| SLC24A3                                               | 2.59  | 1.50E-03        | 2.53E-02           | GRN                                                     | -1.83 | 1.20E-03        | 2.31E-02           |

|          |      |          |          |          |       |          |          |
|----------|------|----------|----------|----------|-------|----------|----------|
| DIRAS1   | 2.58 | 2.10E-03 | 2.92E-02 | AGTRAP   | -1.84 | 1.00E-04 | 1.22E-02 |
| GSTCD    | 2.57 | 3.00E-04 | 1.52E-02 | TLE4     | -1.84 | 2.00E-04 | 1.40E-02 |
| HSPA13   | 2.57 | 2.70E-03 | 3.17E-02 | IRF7     | -1.85 | 1.60E-03 | 2.61E-02 |
| ZBTB11   | 2.55 | 7.00E-04 | 1.91E-02 | RRBP1    | -1.85 | 2.40E-03 | 3.09E-02 |
| PACRGL   | 2.54 | 4.00E-04 | 1.63E-02 | CAMK1    | -1.86 | 4.00E-04 | 1.58E-02 |
| ZNF136   | 2.54 | 7.00E-04 | 1.89E-02 | C4orf48  | -1.87 | 7.00E-04 | 1.91E-02 |
| AIF1L    | 2.54 | 5.20E-03 | 4.31E-02 | BEST1    | -1.88 | 5.00E-04 | 1.77E-02 |
| SERAC1   | 2.52 | 0.00E+00 | 9.90E-03 | C1orf162 | -1.91 | 3.00E-03 | 3.34E-02 |
| RNF217   | 2.52 | 1.10E-03 | 2.26E-02 | SH3TC1   | -1.91 | 6.80E-03 | 4.94E-02 |
| ATP8A1   | 2.52 | 5.40E-03 | 4.40E-02 | RRAS     | -1.92 | 3.20E-03 | 3.38E-02 |
| USP46    | 2.49 | 1.00E-04 | 1.22E-02 | HCST     | -1.93 | 2.00E-04 | 1.38E-02 |
| ARHGAP18 | 2.49 | 3.00E-04 | 1.40E-02 | DUSP1    | -1.93 | 2.80E-03 | 3.21E-02 |
| LATS1    | 2.49 | 1.40E-03 | 2.49E-02 | NFKB2    | -1.94 | 1.00E-03 | 2.21E-02 |
| TMEM231  | 2.48 | 7.00E-04 | 1.91E-02 | HRH2     | -1.94 | 2.40E-03 | 3.10E-02 |
| LRRC37B  | 2.48 | 1.10E-03 | 2.26E-02 | FOS      | -1.94 | 4.20E-03 | 3.87E-02 |
| NEK7     | 2.46 | 8.00E-04 | 2.05E-02 | CCDC88B  | -1.96 | 1.20E-03 | 2.29E-02 |
| SEC23A   | 2.46 | 9.00E-04 | 2.11E-02 | CECR1    | -1.96 | 6.40E-03 | 4.78E-02 |
| SVOPL    | 2.45 | 4.00E-04 | 1.63E-02 | NINJ1    | -1.96 | 6.60E-03 | 4.88E-02 |
| PLEKHA4  | 2.44 | 1.40E-03 | 2.46E-02 | ITGAL    | -1.97 | 1.00E-04 | 1.18E-02 |
| ZNF569   | 2.43 | 1.00E-04 | 1.22E-02 | SRGAP2C  | -1.97 | 6.40E-03 | 4.78E-02 |
| ZBTB34   | 2.43 | 6.00E-04 | 1.86E-02 | CYTH4    | -1.98 | 6.00E-04 | 1.79E-02 |
| ZNF549   | 2.43 | 1.80E-03 | 2.75E-02 | ISG15    | -1.99 | 2.50E-03 | 3.10E-02 |
| RCN2     | 2.42 | 1.80E-03 | 2.75E-02 | PSTPIP1  | -1.99 | 3.30E-03 | 3.45E-02 |
| CHML     | 2.41 | 1.40E-03 | 2.45E-02 | METRNL   | -1.99 | 5.40E-03 | 4.38E-02 |
| HOXA5    | 2.41 | 3.60E-03 | 3.57E-02 | LSP1     | -2.01 | 1.00E-04 | 1.18E-02 |
| WDR35    | 2.4  | 3.00E-04 | 1.52E-02 | SLC16A3  | -2.01 | 6.00E-04 | 1.82E-02 |
| MTHFD2L  | 2.39 | 1.20E-03 | 2.31E-02 | SLC43A2  | -2.01 | 2.00E-03 | 2.84E-02 |
| KLHL28   | 2.38 | 2.00E-04 | 1.38E-02 | CST3     | -2.02 | 2.00E-04 | 1.31E-02 |
| DCUN1D1  | 2.38 | 5.00E-04 | 1.67E-02 | TNFAIP2  | -2.03 | 3.10E-03 | 3.38E-02 |
| ZNF736   | 2.38 | 7.00E-04 | 1.91E-02 | CEBPB    | -2.07 | 1.60E-03 | 2.63E-02 |
| ZBTB38   | 2.36 | 4.30E-03 | 3.88E-02 | CDC42EP2 | -2.09 | 2.00E-04 | 1.27E-02 |
| METTL25  | 2.35 | 3.70E-03 | 3.61E-02 | TNFSF10  | -2.09 | 1.20E-03 | 2.29E-02 |
| CCSAP    | 2.34 | 4.00E-04 | 1.63E-02 | SPON2    | -2.1  | 6.00E-04 | 1.85E-02 |
| TSPYL5   | 2.34 | 4.40E-03 | 3.91E-02 | BTG2     | -2.1  | 7.00E-04 | 1.91E-02 |
| FREM1    | 2.33 | 1.80E-03 | 2.72E-02 | CKAP4    | -2.1  | 4.10E-03 | 3.84E-02 |
| ZNF329   | 2.32 | 9.00E-04 | 2.07E-02 | C10orf54 | -2.11 | 1.80E-03 | 2.75E-02 |
| SWT1     | 2.32 | 1.50E-03 | 2.51E-02 | RHOB     | -2.12 | 1.80E-03 | 2.75E-02 |
| BRIP1    | 2.32 | 2.60E-03 | 3.17E-02 | ZFP36    | -2.12 | 4.60E-03 | 4.02E-02 |
| SLAIN1   | 2.3  | 1.00E-03 | 2.22E-02 | IGHM     | -2.13 | 8.00E-04 | 1.98E-02 |
| TMX3     | 2.3  | 1.70E-03 | 2.68E-02 | CD79A    | -2.13 | 3.50E-03 | 3.55E-02 |
| PBX1     | 2.29 | 1.10E-03 | 2.28E-02 | RGS2     | -2.16 | 4.00E-03 | 3.76E-02 |
| SLCO4A1  | 2.26 | 1.10E-03 | 2.25E-02 | IL17RA   | -2.19 | 2.00E-04 | 1.31E-02 |
| ZNF614   | 2.26 | 1.40E-03 | 2.46E-02 | ARL4C    | -2.19 | 1.20E-03 | 2.30E-02 |
| ACBD5    | 2.25 | 1.20E-03 | 2.31E-02 | MSRB1    | -2.22 | 3.00E-04 | 1.42E-02 |
| THAP1    | 2.23 | 4.00E-04 | 1.58E-02 | NKG7     | -2.24 | 2.90E-03 | 3.25E-02 |
| MFN1     | 2.23 | 1.10E-03 | 2.24E-02 | ID2      | -2.24 | 4.50E-03 | 4.00E-02 |
| GTPBP8   | 2.22 | 4.00E-04 | 1.56E-02 | RHBDF2   | -2.27 | 7.00E-04 | 1.89E-02 |
| DMXL1    | 2.21 | 2.70E-03 | 3.17E-02 | CYSTM1   | -2.27 | 2.20E-03 | 2.97E-02 |
| TWF1     | 2.2  | 3.30E-03 | 3.42E-02 | B3GALT4  | -2.29 | 1.10E-03 | 2.26E-02 |
| SMO      | 2.2  | 6.10E-03 | 4.73E-02 | CEBPD    | -2.3  | 2.70E-03 | 3.20E-02 |
| SCML2    | 2.19 | 1.70E-03 | 2.66E-02 | GBP2     | -2.32 | 1.20E-03 | 2.31E-02 |
| FAM234B  | 2.19 | 6.20E-03 | 4.77E-02 | FCER1G   | -2.33 | 6.40E-03 | 4.81E-02 |
| FAM19A2  | 2.19 | 6.80E-03 | 4.96E-02 | FYB      | -2.34 | 5.00E-04 | 1.71E-02 |
| TBC1D16  | 2.18 | 4.70E-03 | 4.07E-02 | ADAP1    | -2.37 | 1.20E-03 | 2.31E-02 |

|          |      |          |          |          |       |          |          |
|----------|------|----------|----------|----------|-------|----------|----------|
| BBS7     | 2.17 | 6.00E-04 | 1.86E-02 | CFP      | -2.38 | 1.20E-03 | 2.30E-02 |
| RAB39B   | 2.16 | 3.80E-03 | 3.65E-02 | HVCN1    | -2.4  | 2.50E-03 | 3.14E-02 |
| CEP162   | 2.16 | 4.10E-03 | 3.79E-02 | NAGK     | -2.44 | 0.00E+00 | 7.10E-03 |
| CGRRF1   | 2.16 | 4.60E-03 | 4.02E-02 | IFI27L2  | -2.45 | 2.00E-04 | 1.27E-02 |
| LEPR     | 2.15 | 0.00E+00 | 1.00E-04 | JUN      | -2.46 | 4.00E-04 | 1.56E-02 |
| KCNQ5    | 2.15 | 2.70E-03 | 3.20E-02 | P2RX7    | -2.48 | 2.00E-04 | 1.23E-02 |
| TRIB2    | 2.14 | 2.00E-03 | 2.84E-02 | PLAUR    | -2.49 | 6.30E-03 | 4.78E-02 |
| RFX7     | 2.14 | 6.70E-03 | 4.91E-02 | PLK3     | -2.5  | 2.00E-04 | 1.23E-02 |
| CCDC171  | 2.13 | 4.40E-03 | 3.91E-02 | TYROBP   | -2.52 | 4.50E-03 | 4.00E-02 |
| DTD2     | 2.12 | 5.00E-03 | 4.23E-02 | TNFRSF1B | -2.53 | 5.00E-04 | 1.78E-02 |
| THAP5    | 2.12 | 5.90E-03 | 4.67E-02 | GRK5     | -2.53 | 6.00E-04 | 1.84E-02 |
| EOGT     | 2.11 | 4.00E-04 | 1.63E-02 | APOBR    | -2.62 | 2.00E-04 | 1.29E-02 |
| COG6     | 2.11 | 4.40E-03 | 3.91E-02 | DOK2     | -2.63 | 6.00E-04 | 1.80E-02 |
| SPRY2    | 2.09 | 3.00E-04 | 1.47E-02 | SLC2A6   | -2.64 | 1.40E-03 | 2.47E-02 |
| ARL5B    | 2.09 | 2.80E-03 | 3.25E-02 | EGR1     | -2.64 | 1.70E-03 | 2.72E-02 |
| FZD1     | 2.09 | 4.50E-03 | 4.00E-02 | JAML     | -2.64 | 2.00E-03 | 2.85E-02 |
| ZNF367   | 2.08 | 3.40E-03 | 3.45E-02 | S100A11  | -2.72 | 8.00E-04 | 1.91E-02 |
| KCTD9    | 2.07 | 1.80E-03 | 2.72E-02 | FGR      | -2.8  | 3.20E-03 | 3.38E-02 |
| PAQR3    | 2.06 | 1.60E-03 | 2.61E-02 | CTSH     | -2.82 | 1.10E-03 | 2.25E-02 |
| MED21    | 2.06 | 2.60E-03 | 3.15E-02 | NBPF26   | -2.82 | 5.40E-03 | 4.41E-02 |
| AASDH    | 2.05 | 2.50E-03 | 3.13E-02 | LTB      | -2.84 | 1.00E-03 | 2.22E-02 |
| C2orf69  | 2.04 | 1.90E-03 | 2.79E-02 | HCK      | -2.85 | 6.00E-04 | 1.86E-02 |
| STXBP1   | 2.04 | 2.40E-03 | 3.10E-02 | CYBB     | -2.87 | 5.10E-03 | 4.26E-02 |
| IL6ST    | 2.04 | 3.40E-03 | 3.46E-02 | SLC11A1  | -2.9  | 3.00E-04 | 1.45E-02 |
| PLEKHA8  | 2.03 | 3.50E-03 | 3.52E-02 | ASGR1    | -2.93 | 2.00E-04 | 1.23E-02 |
| PDZD8    | 2.02 | 0.00E+00 | 7.10E-03 | LILRB2   | -2.96 | 3.60E-03 | 3.56E-02 |
| MTRF1L   | 2.02 | 2.80E-03 | 3.25E-02 | POU2F2   | -3    | 1.00E-04 | 1.22E-02 |
| SNUPN    | 2.02 | 4.20E-03 | 3.87E-02 | KLF2     | -3.05 | 2.00E-04 | 1.29E-02 |
| ACTR6    | 2.01 | 1.10E-03 | 2.25E-02 | NCF1     | -3.31 | 6.20E-03 | 4.75E-02 |
| SCYL2    | 2.01 | 1.50E-03 | 2.50E-02 | FAM20C   | -3.42 | 7.00E-04 | 1.88E-02 |
| ZNF761   | 2.01 | 4.20E-03 | 3.86E-02 | PLEC     | -3.63 | 2.00E-04 | 1.23E-02 |
| RALGAPA1 | 2.01 | 5.90E-03 | 4.66E-02 | TYMP     | -3.96 | 3.00E-04 | 1.47E-02 |
| NEDD4    | 2    | 1.50E-03 | 2.56E-02 | FCN1     | -4.17 | 6.00E-04 | 1.80E-02 |
| OMA1     | 1.99 | 7.00E-04 | 1.91E-02 | S100A9   | -4.3  | 1.10E-03 | 2.24E-02 |
| VCPKMT   | 1.99 | 1.10E-03 | 2.26E-02 | S100A8   | -4.36 | 1.10E-03 | 2.28E-02 |
| CLIC4    | 1.99 | 3.10E-03 | 3.35E-02 | SERPINA1 | -4.48 | 1.10E-03 | 2.26E-02 |
| FKTN     | 1.99 | 6.00E-03 | 4.72E-02 | LRP1     | -4.85 | 4.20E-03 | 3.86E-02 |
| ASAP2    | 1.98 | 4.70E-03 | 4.04E-02 |          |       |          |          |
| CFAP97   | 1.97 | 1.00E-04 | 1.18E-02 |          |       |          |          |
| BCKDHB   | 1.97 | 9.00E-04 | 2.07E-02 |          |       |          |          |
| FGGY     | 1.97 | 1.30E-03 | 2.36E-02 |          |       |          |          |
| GAN      | 1.97 | 2.90E-03 | 3.28E-02 |          |       |          |          |
| MPP6     | 1.97 | 5.60E-03 | 4.53E-02 |          |       |          |          |
| C9orf85  | 1.96 | 2.60E-03 | 3.14E-02 |          |       |          |          |
| ZNF880   | 1.96 | 3.10E-03 | 3.36E-02 |          |       |          |          |
| PANK3    | 1.95 | 3.30E-03 | 3.42E-02 |          |       |          |          |
| PDGFC    | 1.95 | 4.00E-03 | 3.79E-02 |          |       |          |          |
| PTBP2    | 1.95 | 6.80E-03 | 4.94E-02 |          |       |          |          |
| ABCC4    | 1.94 | 0.00E+00 | 7.10E-03 |          |       |          |          |
| GNA13    | 1.94 | 1.60E-03 | 2.61E-02 |          |       |          |          |
| TMEM237  | 1.94 | 2.40E-03 | 3.10E-02 |          |       |          |          |
| CLC      | 1.94 | 2.70E-03 | 3.19E-02 |          |       |          |          |
| PRPF18   | 1.94 | 3.10E-03 | 3.35E-02 |          |       |          |          |
| SLC22A5  | 1.93 | 2.40E-03 | 3.10E-02 |          |       |          |          |

|          |      |          |          |
|----------|------|----------|----------|
| ZNF521   | 1.93 | 2.40E-03 | 3.10E-02 |
| RBBP9    | 1.93 | 5.50E-03 | 4.47E-02 |
| SLC35D1  | 1.92 | 1.10E-03 | 2.24E-02 |
| GABPA    | 1.92 | 2.20E-03 | 3.01E-02 |
| FAM83D   | 1.92 | 2.90E-03 | 3.29E-02 |
| SLC41A1  | 1.92 | 4.30E-03 | 3.88E-02 |
| DEPDC1B  | 1.92 | 4.70E-03 | 4.07E-02 |
| ZNF256   | 1.92 | 6.80E-03 | 4.95E-02 |
| TMEM64   | 1.91 | 1.00E-04 | 1.08E-02 |
| RBM45    | 1.91 | 2.30E-03 | 3.03E-02 |
| METTL10  | 1.91 | 2.90E-03 | 3.27E-02 |
| TRIM59   | 1.9  | 6.00E-04 | 1.83E-02 |
| NR1D2    | 1.9  | 2.10E-03 | 2.92E-02 |
| ZNF354A  | 1.9  | 3.40E-03 | 3.45E-02 |
| TRUB1    | 1.89 | 1.00E-03 | 2.21E-02 |
| PCYT1B   | 1.89 | 6.10E-03 | 4.75E-02 |
| ZNF850   | 1.88 | 2.50E-03 | 3.14E-02 |
| SLC25A15 | 1.86 | 9.00E-04 | 2.11E-02 |
| CEP97    | 1.85 | 1.20E-03 | 2.29E-02 |
| SCRN1    | 1.85 | 1.30E-03 | 2.33E-02 |
| MBNL2    | 1.85 | 1.70E-03 | 2.68E-02 |
| ZNF124   | 1.85 | 3.20E-03 | 3.38E-02 |
| DCAF17   | 1.85 | 3.70E-03 | 3.62E-02 |
| NUP54    | 1.84 | 2.60E-03 | 3.14E-02 |
| CYYR1    | 1.83 | 2.00E-04 | 1.33E-02 |
| C1orf109 | 1.83 | 7.00E-04 | 1.89E-02 |
| RHOBTB1  | 1.82 | 1.70E-03 | 2.68E-02 |
| UACA     | 1.82 | 2.10E-03 | 2.93E-02 |
| ZNF711   | 1.82 | 2.30E-03 | 3.07E-02 |
| TMEM106B | 1.82 | 6.70E-03 | 4.94E-02 |
| ZNF493   | 1.8  | 2.80E-03 | 3.21E-02 |
| MED12L   | 1.8  | 3.60E-03 | 3.59E-02 |
| ZNF717   | 1.8  | 5.00E-03 | 4.22E-02 |
| IFT81    | 1.8  | 6.90E-03 | 4.98E-02 |
| DLC1     | 1.79 | 1.00E-04 | 1.22E-02 |
| TPD52    | 1.79 | 2.00E-03 | 2.86E-02 |
| ZSCAN9   | 1.78 | 3.80E-03 | 3.67E-02 |
| FRS2     | 1.78 | 5.60E-03 | 4.51E-02 |
| KPNA5    | 1.78 | 6.60E-03 | 4.90E-02 |
| RHOBTB3  | 1.77 | 1.70E-03 | 2.66E-02 |
| ZNF726   | 1.77 | 5.60E-03 | 4.51E-02 |
| ZNF568   | 1.77 | 5.70E-03 | 4.55E-02 |
| FNDC3A   | 1.77 | 6.10E-03 | 4.73E-02 |
| SUCLG2   | 1.76 | 4.30E-03 | 3.88E-02 |
| METTL21B | 1.74 | 9.00E-04 | 2.11E-02 |
| ZNF792   | 1.74 | 1.90E-03 | 2.79E-02 |
| ZNF254   | 1.73 | 3.80E-03 | 3.64E-02 |
| TTC26    | 1.72 | 2.90E-03 | 3.29E-02 |
| MBIP     | 1.71 | 1.50E-03 | 2.50E-02 |
| ACADSB   | 1.71 | 1.70E-03 | 2.69E-02 |
| RRAGB    | 1.71 | 2.00E-03 | 2.88E-02 |
| CAMKMT   | 1.71 | 2.70E-03 | 3.17E-02 |
| POT1     | 1.71 | 3.10E-03 | 3.35E-02 |
| BDH2     | 1.7  | 1.50E-03 | 2.52E-02 |

|         |      |          |          |
|---------|------|----------|----------|
| LRRC40  | 1.7  | 2.70E-03 | 3.18E-02 |
| PEX1    | 1.7  | 4.20E-03 | 3.86E-02 |
| GPHN    | 1.7  | 4.30E-03 | 3.89E-02 |
| UBE2E3  | 1.69 | 1.00E-03 | 2.21E-02 |
| CDC23   | 1.69 | 3.20E-03 | 3.38E-02 |
| CCNT1   | 1.69 | 4.00E-03 | 3.78E-02 |
| PRKACB  | 1.68 | 1.00E-04 | 1.22E-02 |
| PARPBP  | 1.68 | 2.10E-03 | 2.92E-02 |
| CKAP2   | 1.66 | 1.00E-04 | 1.23E-02 |
| SPAST   | 1.66 | 5.00E-04 | 1.71E-02 |
| THAP12  | 1.66 | 3.70E-03 | 3.61E-02 |
| AHCYL2  | 1.66 | 4.60E-03 | 4.02E-02 |
| MORC3   | 1.65 | 2.70E-03 | 3.17E-02 |
| RIMKLB  | 1.65 | 6.70E-03 | 4.94E-02 |
| DPY19L3 | 1.64 | 3.20E-03 | 3.38E-02 |
| DNAJC6  | 1.64 | 4.50E-03 | 3.97E-02 |
| PIKFYVE | 1.63 | 3.80E-03 | 3.64E-02 |
| FAM8A1  | 1.62 | 3.90E-03 | 3.71E-02 |
| STK3    | 1.62 | 4.20E-03 | 3.86E-02 |
| CDC14A  | 1.62 | 5.40E-03 | 4.38E-02 |
| TOM1L1  | 1.62 | 5.80E-03 | 4.58E-02 |
| MBNL3   | 1.61 | 6.00E-04 | 1.86E-02 |
| ZNF141  | 1.6  | 9.00E-04 | 2.11E-02 |
| SH3YL1  | 1.6  | 4.50E-03 | 3.99E-02 |
| ZNF664  | 1.59 | 0.00E+00 | 8.50E-03 |
| FBXO28  | 1.59 | 4.20E-03 | 3.86E-02 |
| TWSG1   | 1.58 | 2.00E-04 | 1.38E-02 |
| POLE2   | 1.58 | 4.90E-03 | 4.17E-02 |
| LCLAT1  | 1.58 | 5.80E-03 | 4.61E-02 |
| SSX2IP  | 1.56 | 3.50E-03 | 3.52E-02 |
| TMTC4   | 1.56 | 5.60E-03 | 4.51E-02 |
| PRRC1   | 1.56 | 6.50E-03 | 4.83E-02 |
| LYPLA1  | 1.55 | 1.10E-03 | 2.24E-02 |
| ENOX2   | 1.55 | 2.90E-03 | 3.25E-02 |
| PDK1    | 1.55 | 3.20E-03 | 3.38E-02 |
| STXBP5  | 1.54 | 0.00E+00 | 7.10E-03 |
| PRKCI   | 1.54 | 5.00E-04 | 1.67E-02 |
| ATP13A3 | 1.54 | 1.10E-03 | 2.25E-02 |
| VPS13A  | 1.54 | 3.70E-03 | 3.62E-02 |
| VAV3    | 1.54 | 4.00E-03 | 3.76E-02 |
| DUS4L   | 1.53 | 3.80E-03 | 3.66E-02 |
| CUL4B   | 1.53 | 5.50E-03 | 4.47E-02 |
| ZNF383  | 1.52 | 3.90E-03 | 3.70E-02 |
| PRKAR2B | 1.51 | 0.00E+00 | 2.10E-03 |
| KIF2A   | 1.5  | 4.00E-04 | 1.63E-02 |
| DNAJC12 | 1.5  | 2.60E-03 | 3.17E-02 |
| PARP11  | 1.5  | 5.00E-03 | 4.21E-02 |

**Table S3.** All pathways differentially regulated in pediatric CML compared to adult CML, sorted according to GeneRatio level. *p* values were obtained using hypergeometric test.

| Pathway.                                                                                                                      | GeneRatio | <i>p</i> Value | Group |
|-------------------------------------------------------------------------------------------------------------------------------|-----------|----------------|-------|
| REACTOME_CROSS_PRESENTATION_OF_PARTICULATE_EXOGENOUS_ANTIGENS<br>_PHAGOSOMES                                                  | 37.50     | 1.67E-05       | down  |
| REACTOME_METAL_SEQUESTRATION_BY_ANTIMICROBIAL_PROTEINS                                                                        | 33.33     | 6.73E-04       | down  |
| REACTOME_DEX_H_BOX_HELICASES_ACTIVATE_TYPE_I_IFN_AND_INFLAMMATO<br>RY_CYTOKINES_PRODUCTION                                    | 28.57     | 9.38E-04       | down  |
| REACTOME_RHO_GTPASES_ACTIVATE_NADPH_OXIDASES                                                                                  | 20.83     | 5.11E-07       | down  |
| REACTOME_THE_NLRP3_INFLAMMASOME                                                                                               | 20.00     | 1.31E-04       | down  |
| REACTOME_ACTIVATION_OF_THE_AP_1_FAMILY_OF_TRANSCRIPTION_FACTORS                                                               | 20.00     | 1.98E-03       | down  |
| REACTOME_ALTERNATIVE_COMPLEMENT_ACTIVATION                                                                                    | 20.00     | 3.35E-02       | down  |
| REACTOME_CD22_MEDIATED_BCR_REGULATION                                                                                         | 20.00     | 3.35E-02       | down  |
| REACTOME_FICOLINS_BIND_TO_REPETITIVE_CARBOHYDRATE_STRUCTURES_O<br>N_THE_TARGET_CELL_SURFACE                                   | 20.00     | 3.35E-02       | down  |
| REACTOME_LEUKOTRIENE_RECEPTORS                                                                                                | 20.00     | 3.35E-02       | down  |
| REACTOME_CREB1_PHOSPHORYLATION_THROUGH_THE_ACTIVATION_OF_ADEN<br>YLATE_CYCLASE                                                | 16.67     | 9.85E-03       | up    |
| REACTOME_ROS_AND_RNS_PRODUCTION_IN_PHAGOCYTES                                                                                 | 16.67     | 1.44E-07       | down  |
| REACTOME_FCGR_ACTIVATION                                                                                                      | 16.67     | 2.88E-03       | down  |
| REACTOME_PROTEIN_REPAIR                                                                                                       | 16.67     | 4.00E-02       | down  |
| REACTOME_PROTON_COUPLED_MONOCARBOXYLATE_TRANSPORT                                                                             | 16.67     | 4.00E-02       | down  |
| REACTOME_RUNX3_REGULATES_IMMUNE_RESPONSE_AND_CELL_MIGRATION                                                                   | 16.67     | 4.00E-02       | down  |
| REACTOME_VLDL_CLEARANCE                                                                                                       | 16.67     | 4.00E-02       | down  |
| REACTOME DISSOLUTION OF FIBRIN CLOT                                                                                           | 15.38     | 3.39E-03       | down  |
| REACTOME_SCAVENGING_OF_HEME_FROM_PLASMA                                                                                       | 15.38     | 3.39E-03       | down  |
| REACTOME_INFLAMMASOMES                                                                                                        | 15.00     | 3.20E-04       | down  |
| REACTOME_ACTIVATION_OF_C3_AND_C5                                                                                              | 14.29     | 4.65E-02       | down  |
| REACTOME_ACTIVATION_OF_RAC1_DOWNSTREAM_OF_NMDARS                                                                              | 14.29     | 4.65E-02       | down  |
| REACTOME_ATTACHMENT_OF_GPI_ANCHOR_TO_UPAR                                                                                     | 14.29     | 4.65E-02       | down  |
| REACTOME_IKBA_VARIANT_LEADS_TO_EDA_ID                                                                                         | 14.29     | 4.65E-02       | down  |
| REACTOME_PHOSPHATE_BOND_HYDROLYSIS_BY_NUDT_PROTEINS                                                                           | 14.29     | 4.65E-02       | down  |
| REACTOME_RUNX3_REGULATES_CDKN1A_TRANSCRIPTION                                                                                 | 14.29     | 4.65E-02       | down  |
| REACTOME_RAF_INDEPENDENT_MAPK1_3_ACTIVATION                                                                                   | 13.04     | 4.90E-04       | down  |
| REACTOME_PKA_ACTIVATION_IN_GLUCAGON_SIGNALLING                                                                                | 11.76     | 1.95E-02       | up    |
| REACTOME_PROTEIN_METHYLATION                                                                                                  | 11.76     | 1.95E-02       | up    |
| REACTOME_BRANCHED_CHAIN_AMINO_ACID_CATABOLISM                                                                                 | 10.53     | 2.41E-02       | up    |
| REACTOME_CONVERSION_FROM_APC_C:CD20_TO_APC_C:CDH1_IN_LATE_ANA<br>PHASE                                                        | 10.53     | 2.41E-02       | up    |
| REACTOME_PKA_MEDIATED_PHOSPHORYLATION_OF_CREB                                                                                 | 10.53     | 2.41E-02       | up    |
| REACTOME_OTHER_SEMAPHORIN_INTERACTIONS                                                                                        | 10.53     | 7.24E-03       | down  |
| REACTOME_REGULATION_OF_TLR_BY_ENDOGENOUS_LIGAND                                                                               | 10.53     | 7.24E-03       | down  |
| REACTOME_SIGNALING_BY_HIPPO                                                                                                   | 10.00     | 2.65E-02       | up    |
| REACTOME_TP53_REGULATES_TRANSCRIPTION_OF_ADDITIONAL_CELL_CYCLE_<br>GENES_WHOSE_EXACT_ROLE_IN_THE_P53_PATHWAY_REMAIN_UNCERTAIN | 9.52      | 8.82E-03       | down  |
| REACTOME_FICOLINS_BIND_TO_REPETITIVE_CARBOHYDRATE_STRUCTURES_O<br>N_THE_TARGET_CELL_SURFACE                                   | 9.38      | 1.31E-03       | down  |
| REACTOME_INITIAL_TRIGGERING_OF_COMPLEMENT                                                                                     | 9.09      | 9.66E-03       | down  |
| REACTOME_BBSOME_MEDIATED_CARGO_TARGETING_TO_CILIUM                                                                            | 8.70      | 3.44E-02       | up    |
| REACTOME_DARPP_32_EVENTS                                                                                                      | 8.33      | 3.73E-02       | up    |
| REACTOME_DISEASES_OF_IMMUNE_SYSTEM                                                                                            | 8.33      | 1.14E-02       | down  |
| REACTOME_SEMA4D_IN_SEMAPHORIN_SIGNALING                                                                                       | 8.33      | 1.14E-02       | down  |
| REACTOME_RETROGRADE_TRANSPORT_AT_THE_TRANS_GOLGI_NETWORK                                                                      | 8.16      | 3.50E-03       | up    |
| REACTOME_DETOXIFICATION_OF_REACTIVE_OXYGEN_SPECIES                                                                            | 8.11      | 2.00E-03       | down  |
| REACTOME_SURFACTANT_METABOLISM                                                                                                | 6.90      | 1.65E-02       | down  |

|                                                                                                                                  |      |          |      |
|----------------------------------------------------------------------------------------------------------------------------------|------|----------|------|
| REACTOME_MAPK_TARGETS_NUCLEAR_EVENTS_MEDIATED_BY_MAP_KINASES                                                                     | 6.45 | 1.87E-02 | down |
| REACTOME_PYRUVATE_METABOLISM                                                                                                     | 6.45 | 1.87E-02 | down |
| REACTOME_NEUTROPHIL_DEGRANULATION                                                                                                | 6.28 | 9.76E-21 | down |
| REACTOME_SEMAPHORIN_INTERACTIONS                                                                                                 | 6.25 | 9.40E-04 | down |
| REACTOME_INTERFERON_ALPHA_BETA_SIGNALING                                                                                         | 5.80 | 1.25E-03 | down |
| REACTOME_GPVI_MEDIATED_ACTIVATION_CASCADE                                                                                        | 5.71 | 2.35E-02 | down |
| REACTOME_INTRAFLAGELLAR_TRANSPORT                                                                                                | 5.56 | 3.16E-02 | up   |
| REACTOME_NUCLEOTIDE_BINDING_DOMAIN_LEUCINE_RICH_REPEAT_CONTAINING_RECEPTOR_NLR_SIGNALING_PATHWAYS                                | 5.56 | 5.89E-03 | down |
| REACTOME_NUCLEOBASE_CATABOLISM                                                                                                   | 5.56 | 2.48E-02 | down |
| REACTOME_O_GLYCOSYLATION_OF_TSR_DOMAIN_CONTAINING_PROTEINS                                                                       | 5.26 | 2.74E-02 | down |
| REACTOME_ANCHORING_OF_THE_BASAL_BODY_TO_THE_PLASMA_MEMBRANE                                                                      | 5.15 | 8.10E-03 | up   |
| REACTOME_NEGATIVE_REGULATION_OF_MAPK_PATHWAY                                                                                     | 5.00 | 3.01E-02 | down |
| REACTOME_CILIUM_ASSEMBLY                                                                                                         | 4.98 | 2.70E-04 | up   |
| REACTOME_REGULATION_OF_INSULIN_LIKE_GROWTH_FACTOR_IGF_TRANSPORT_AND_UPTAKE_BY_INSULIN_LIKE_GROWTH_FACTOR_BINDING_PROTEINS_IGFBP5 | 4.84 | 2.02E-04 | down |
| REACTOME_BINDING_AND_UPTAKE_OF_LIGANDS_BY_SCAVENGER_RECEPTORS                                                                    | 4.76 | 3.30E-02 | down |
| REACTOME_TOLL_LIKE_RECEPTOR_CASCADES                                                                                             | 4.58 | 8.43E-05 | down |
| REACTOME_INTERLEUKIN_10_SIGNALING                                                                                                | 4.35 | 3.89E-02 | down |
| REACTOME_RHO_GTPASE_CYCLE                                                                                                        | 4.32 | 8.95E-03 | up   |
| REACTOME_INTERLEUKIN_17_SIGNALING                                                                                                | 4.23 | 1.25E-02 | down |
| REACTOME_TOLL_LIKE_RECEPTOR_9_TLR9_CASCADE                                                                                       | 4.21 | 4.01E-03 | down |
| REACTOME_TRIF_TICAM1_MEDIATED_TLR4_SIGNALING                                                                                     | 4.12 | 4.31E-03 | down |
| REACTOME_TP53_REGULATES_TRANSCRIPTION_OF_CELL_CYCLE_GENES                                                                        | 4.08 | 4.37E-02 | down |
| REACTOME_ORGANELLE_BIOGENESIS_AND_MAINTENANCE                                                                                    | 4.07 | 4.33E-04 | up   |
| REACTOME_IMMUNOREGULATORY_INTERACTIONS_BETWEEN_A_LYMPHOID_AND_A_NON_LYMPHOID_CELL                                                | 3.94 | 1.75E-03 | down |
| REACTOME_DDX58_IFIH1_MEDIATED_INDUCION_OF_INTERFERON_ALPHA_BETA                                                                  | 3.85 | 1.61E-02 | down |
| REACTOME_INNATE_IMMUNE_SYSTEM                                                                                                    | 3.83 | 7.94E-20 | down |
| REACTOME_INTERLEUKIN_4_AND_INTERLEUKIN_13_SIGNALING                                                                              | 3.70 | 6.30E-03 | down |
| REACTOME_CELL_SURFACE_INTERACTIONS_AT_THE_VASCULAR_WALL                                                                          | 3.65 | 2.44E-03 | down |
| REACTOME_MYD88_CASCADE_INITIATED_ON_PLASMA_MEMBRANE                                                                              | 3.57 | 1.95E-02 | down |
| REACTOME_TRANSCRIPTIONAL_REGULATION_OF_WHITE_ADIPOCYTE_DIFFERENTIATION                                                           | 3.57 | 1.95E-02 | down |
| REACTOME_TRANSCRIPTIONAL_REGULATION_OF_GRANULOPOIESIS                                                                            | 3.41 | 2.21E-02 | down |
| REACTOME_TOLL_LIKE_RECEPTOR_4_TLR4_CASCADE                                                                                       | 3.15 | 1.10E-02 | down |
| REACTOME_ANTIMICROBIAL_PEPTIDES                                                                                                  | 3.13 | 2.76E-02 | down |
| REACTOME_TOLL_LIKE_RECEPTOR_TLR1:TLR2_CASCADE                                                                                    | 3.09 | 2.84E-02 | down |
| REACTOME_ANTIGEN_PROCESSING_CROSS_PRESENTATION                                                                                   | 3.03 | 2.99E-02 | down |
| REACTOME_TNFR2_NON_CANONICAL_NF_KB_PATHWAY                                                                                       | 3.00 | 3.07E-02 | down |
| REACTOME_SIGNALING_BY_VEGF                                                                                                       | 2.86 | 3.47E-02 | down |
| REACTOME_SENESCENCE_ASSOCIATED_SECRETORY_PHENOTYPE_SASP                                                                          | 2.78 | 3.72E-02 | down |
| REACTOME_GENERIC_TRANSCRIPTION_PATHWAY                                                                                           | 2.14 | 7.07E-03 | up   |
| REACTOME_CYTOKINE_SIGNALING_IN_IMMUNE_SYSTEM                                                                                     | 2.12 | 1.80E-05 | down |
| REACTOME_SIGNALING_BY_INTERLEUKINS                                                                                               | 2.07 | 3.51E-04 | down |
| REACTOME_INTERFERON_SIGNALING                                                                                                    | 2.01 | 4.68E-02 | down |
| REACTOME_HEMOSTASIS                                                                                                              | 1.94 | 1.02E-03 | down |
| REACTOME_RHO_GTPASE_EFFECTORS                                                                                                    | 1.87 | 2.24E-02 | down |
| REACTOME_GENE_EXPRESSION_TRANSCRIPTION                                                                                           | 1.83 | 3.81E-02 | up   |
| REACTOME_CELLULAR_RESPONSES_TO_STRESS                                                                                            | 1.60 | 3.00E-02 | down |
| REACTOME_ADAPTIVE_IMMUNE_SYSTEM                                                                                                  | 1.47 | 1.30E-02 | down |

**Table S4.** All DEG in comparison of (pediatric CML vs pediatric healthy) vs (adult CML vs adult healthy), sorted according to logFC level. *p* values were obtained using hypergeometric test. In red are genes that we validated by RT-qPCR.

| Upregulated in Pediatric CML Compared to Adult CML |       |                 |                    | Downregulated in Pediatric CML Compared to Adult CML |       |                 |                    |
|----------------------------------------------------|-------|-----------------|--------------------|------------------------------------------------------|-------|-----------------|--------------------|
| Gene                                               | logFC | <i>p</i> .Value | adj. <i>p</i> .Val | Gene                                                 | logFC | <i>p</i> .Value | adj. <i>p</i> .Val |
| PLOD2                                              | 4.19  | 1.30E-03        | 6.44E-02           | HM13                                                 | -1.01 | 3.70E-03        | 8.19E-02           |
| MYCT1                                              | 4.18  | 0.00E+00        | 4.06E-02           | SLC43A3                                              | -1.01 | 9.50E-03        | 1.10E-01           |
| CD40LG                                             | 3.88  | 9.00E-04        | 5.99E-02           | ACAA1                                                | -1.02 | 1.30E-03        | 6.43E-02           |
| SH3BGRL2                                           | 3.63  | 1.40E-03        | 6.53E-02           | TANGO2                                               | -1.02 | 1.60E-03        | 6.69E-02           |
| FAM171A2                                           | 3.55  | 5.30E-03        | 9.11E-02           | SYK                                                  | -1.02 | 1.80E-03        | 6.73E-02           |
| WDR44                                              | 3.52  | 2.00E-04        | 4.42E-02           | LAMTOR2                                              | -1.02 | 8.80E-03        | 1.08E-01           |
| MYEF2                                              | 3.51  | 1.00E-04        | 4.16E-02           | RHOG                                                 | -1.03 | 7.20E-03        | 1.01E-01           |
| PKIA                                               | 3.51  | 2.00E-04        | 4.61E-02           | NUBP1                                                | -1.04 | 1.10E-03        | 6.35E-02           |
| FAM199X                                            | 3.47  | 3.00E-04        | 5.12E-02           | STX10                                                | -1.04 | 4.40E-03        | 8.74E-02           |
| FREM1                                              | 3.47  | 7.90E-03        | 1.05E-01           | DNAJB1                                               | -1.04 | 7.40E-03        | 1.01E-01           |
| CLDN10                                             | 3.45  | 5.00E-04        | 5.64E-02           | CPTP                                                 | -1.04 | 8.40E-03        | 1.06E-01           |
| CEP70                                              | 3.42  | 0.00E+00        | 4.06E-02           | SNX20                                                | -1.04 | 1.02E-02        | 1.12E-01           |
| BEND4                                              | 3.42  | 1.40E-03        | 6.48E-02           | GNB2                                                 | -1.05 | 7.00E-03        | 1.00E-01           |
| LYSMD3                                             | 3.38  | 8.00E-04        | 5.85E-02           | BORCS6                                               | -1.06 | 7.30E-03        | 1.01E-01           |
| BMI1                                               | 3.37  | 8.00E-04        | 5.85E-02           | HLA.DPA1                                             | -1.06 | 1.00E-02        | 1.12E-01           |
| VANGL2                                             | 3.37  | 5.10E-03        | 9.01E-02           | HPCAL1                                               | -1.07 | 2.70E-03        | 7.38E-02           |
| SLC24A3                                            | 3.36  | 1.90E-03        | 6.76E-02           | IL27RA                                               | -1.08 | 7.30E-03        | 1.01E-01           |
| MYCN                                               | 3.33  | 2.90E-03        | 7.64E-02           | VPS18                                                | -1.09 | 2.30E-03        | 7.13E-02           |
| WFDC1                                              | 3.32  | 2.70E-03        | 7.38E-02           | TOLLIP                                               | -1.09 | 3.00E-03        | 7.79E-02           |
| PEX7                                               | 3.29  | 1.10E-03        | 6.25E-02           | PLOD1                                                | -1.09 | 4.80E-03        | 8.88E-02           |
| SGPP1                                              | 3.29  | 2.10E-03        | 6.85E-02           | PLD3                                                 | -1.09 | 5.50E-03        | 9.19E-02           |
| SVOPL                                              | 3.28  | 8.00E-04        | 5.85E-02           | TRIOBP                                               | -1.1  | 1.60E-03        | 6.73E-02           |
| TTK                                                | 3.26  | 2.90E-03        | 7.64E-02           | KIAA0922                                             | -1.1  | 6.50E-03        | 9.78E-02           |
| ZNF675                                             | 3.24  | 5.00E-04        | 5.61E-02           | PTPN18                                               | -1.1  | 6.80E-03        | 9.95E-02           |
| FKBP14                                             | 3.18  | 1.60E-03        | 6.73E-02           | NUP214                                               | -1.1  | 8.80E-03        | 1.08E-01           |
| OXR1                                               | 3.14  | 7.00E-04        | 5.85E-02           | CCM2                                                 | -1.11 | 7.00E-04        | 5.85E-02           |
| FNBP1L                                             | 3.09  | 1.30E-03        | 6.43E-02           | MFS12                                                | -1.11 | 1.90E-03        | 6.77E-02           |
| SCOC                                               | 3.07  | 4.00E-04        | 5.14E-02           | PARVG                                                | -1.11 | 5.00E-03        | 8.94E-02           |
| SERAC1                                             | 3     | 1.00E-04        | 4.06E-02           | RPS6KA1                                              | -1.12 | 1.00E-03        | 6.16E-02           |
| FAM160B1                                           | 3     | 2.00E-03        | 6.85E-02           | MARK2                                                | -1.12 | 1.50E-03        | 6.62E-02           |
| NUDCD1                                             | 3     | 8.60E-03        | 1.07E-01           | HLA.DPB1                                             | -1.12 | 3.70E-03        | 8.18E-02           |
| ZSCAN12                                            | 2.99  | 1.10E-03        | 6.33E-02           | GALNS                                                | -1.12 | 1.12E-02        | 1.17E-01           |
| TMEM163                                            | 2.98  | 7.30E-03        | 1.01E-01           | PQLC1                                                | -1.13 | 1.60E-03        | 6.69E-02           |
| NEMP2                                              | 2.96  | 1.10E-03        | 6.33E-02           | LAIR1                                                | -1.13 | 4.50E-03        | 8.76E-02           |
| ZNF776                                             | 2.94  | 6.00E-04        | 5.80E-02           | APLP2                                                | -1.13 | 4.60E-03        | 8.76E-02           |
| GALNT12                                            | 2.93  | 1.80E-03        | 6.76E-02           | RNF135                                               | -1.13 | 6.60E-03        | 9.79E-02           |
| ZNF493                                             | 2.92  | 2.00E-04        | 4.42E-02           | SPINT1                                               | -1.14 | 4.50E-03        | 8.76E-02           |
| DIRAS1                                             | 2.92  | 2.10E-03        | 6.85E-02           | SLC27A1                                              | -1.14 | 8.00E-03        | 1.05E-01           |
| ZNF136                                             | 2.91  | 1.30E-03        | 6.48E-02           | TWF2                                                 | -1.14 | 9.70E-03        | 1.11E-01           |
| DNAJC18                                            | 2.89  | 4.00E-04        | 5.14E-02           | SUN2                                                 | -1.15 | 6.50E-03        | 9.78E-02           |
| TADA1                                              | 2.89  | 9.00E-04        | 5.88E-02           | TRADD                                                | -1.16 | 2.10E-03        | 6.85E-02           |
| HOXB2                                              | 2.88  | 1.90E-03        | 6.76E-02           | ABHD8                                                | -1.16 | 5.00E-03        | 8.94E-02           |
| C12orf66                                           | 2.87  | 1.70E-03        | 6.73E-02           | LSM10                                                | -1.16 | 6.50E-03        | 9.78E-02           |
| ZNF555                                             | 2.87  | 4.80E-03        | 8.87E-02           | C20orf27                                             | -1.16 | 8.80E-03        | 1.08E-01           |
| IGF2BP2                                            | 2.86  | 6.70E-03        | 9.91E-02           | EHD1                                                 | -1.16 | 9.20E-03        | 1.10E-01           |
| MTHFD2L                                            | 2.84  | 8.00E-04        | 5.85E-02           | ACTB                                                 | -1.17 | 5.30E-03        | 9.11E-02           |
| FANCF                                              | 2.83  | 6.30E-03        | 9.76E-02           | ITPK1                                                | -1.17 | 8.30E-03        | 1.06E-01           |
| RRM2B                                              | 2.81  | 3.30E-03        | 7.88E-02           | SLC3A2                                               | -1.18 | 1.00E-04        | 4.42E-02           |
| EXTL2                                              | 2.81  | 4.90E-03        | 8.88E-02           | LRPAP1                                               | -1.18 | 7.00E-04        | 5.80E-02           |
| THRB                                               | 2.79  | 9.00E-04        | 5.88E-02           | SHKBP1                                               | -1.18 | 1.90E-03        | 6.78E-02           |



|          |      |          |          |          |       |          |          |
|----------|------|----------|----------|----------|-------|----------|----------|
| PLEKHA4  | 2.78 | 4.10E-03 | 8.59E-02 | QSOX1    | -1.18 | 4.40E-03 | 8.74E-02 |
| SWT1     | 2.78 | 5.70E-03 | 9.29E-02 | APOL3    | -1.18 | 5.20E-03 | 9.10E-02 |
| USP46    | 2.76 | 6.00E-04 | 5.80E-02 | NADK     | -1.19 | 6.00E-04 | 5.80E-02 |
| SASS6    | 2.76 | 2.40E-03 | 7.14E-02 | LENG1    | -1.19 | 2.20E-03 | 6.92E-02 |
| MBTPS2   | 2.76 | 3.90E-03 | 8.43E-02 | CHCHD10  | -1.19 | 7.40E-03 | 1.01E-01 |
| TMEM231  | 2.75 | 4.50E-03 | 8.74E-02 | PIK3CD   | -1.19 | 8.10E-03 | 1.05E-01 |
| ZNF569   | 2.72 | 9.00E-04 | 5.85E-02 | PPP1R18  | -1.2  | 1.50E-03 | 6.65E-02 |
| WDR35    | 2.69 | 8.00E-04 | 5.85E-02 | LTBR     | -1.2  | 3.30E-03 | 7.86E-02 |
| C5       | 2.66 | 1.20E-03 | 6.43E-02 | MAN2B1   | -1.2  | 5.80E-03 | 9.36E-02 |
| KLHL28   | 2.62 | 1.00E-03 | 6.18E-02 | CBX6     | -1.2  | 8.30E-03 | 1.06E-01 |
| ZNF549   | 2.62 | 8.40E-03 | 1.07E-01 | CCDC137  | -1.2  | 9.50E-03 | 1.10E-01 |
| PCYT1B   | 2.61 | 6.10E-03 | 9.62E-02 | RNF122   | -1.2  | 1.03E-02 | 1.12E-01 |
| PACRGL   | 2.6  | 3.90E-03 | 8.42E-02 | PAK1     | -1.21 | 2.10E-03 | 6.85E-02 |
| NAA30    | 2.58 | 2.10E-03 | 6.85E-02 | SRA1     | -1.21 | 5.30E-03 | 9.11E-02 |
| DCUN1D1  | 2.57 | 1.50E-03 | 6.62E-02 | DBNL     | -1.24 | 8.00E-04 | 5.85E-02 |
| RNF217   | 2.56 | 5.10E-03 | 9.01E-02 | DES1     | -1.25 | 1.60E-03 | 6.69E-02 |
| KPNA5    | 2.55 | 1.80E-03 | 6.76E-02 | MAP3K11  | -1.25 | 2.60E-03 | 7.32E-02 |
| ZNF518B  | 2.55 | 2.60E-03 | 7.37E-02 | TRIM8    | -1.25 | 6.40E-03 | 9.78E-02 |
| TRO      | 2.54 | 1.11E-02 | 1.17E-01 | ZDHHC12  | -1.26 | 3.00E-04 | 4.61E-02 |
| PBX1     | 2.53 | 2.80E-03 | 7.50E-02 | GMPPB    | -1.26 | 1.60E-03 | 6.73E-02 |
| MPP6     | 2.53 | 3.30E-03 | 7.86E-02 | OAZ1     | -1.26 | 5.40E-03 | 9.18E-02 |
| CEP83    | 2.53 | 3.40E-03 | 7.92E-02 | MYO1G    | -1.26 | 5.90E-03 | 9.44E-02 |
| TRIB2    | 2.53 | 6.80E-03 | 9.91E-02 | FRAT1    | -1.26 | 9.90E-03 | 1.11E-01 |
| ZNF254   | 2.52 | 7.00E-04 | 5.85E-02 | GPSM3    | -1.28 | 3.20E-03 | 7.79E-02 |
| PLCB4    | 2.52 | 2.40E-03 | 7.15E-02 | FRAT2    | -1.28 | 4.90E-03 | 8.88E-02 |
| PIGZ     | 2.51 | 1.07E-02 | 1.15E-01 | SNX8     | -1.29 | 0.00E+00 | 4.06E-02 |
| CCDC171  | 2.5  | 5.80E-03 | 9.36E-02 | PTK2B    | -1.29 | 3.00E-04 | 4.87E-02 |
| OMA1     | 2.49 | 2.20E-03 | 7.02E-02 | LIMK1    | -1.29 | 4.20E-03 | 8.59E-02 |
| SOC56    | 2.47 | 2.20E-03 | 7.01E-02 | NEK6     | -1.29 | 6.40E-03 | 9.78E-02 |
| XPR1     | 2.47 | 2.50E-03 | 7.27E-02 | XKR8     | -1.29 | 9.70E-03 | 1.10E-01 |
| H1F0     | 2.46 | 3.40E-03 | 7.92E-02 | RIN3     | -1.3  | 2.40E-03 | 7.14E-02 |
| TOM1L1   | 2.44 | 2.70E-03 | 7.38E-02 | RENBP    | -1.3  | 1.05E-02 | 1.14E-01 |
| SPAG16   | 2.44 | 9.10E-03 | 1.09E-01 | DOK3     | -1.31 | 1.30E-03 | 6.43E-02 |
| METTL10  | 2.43 | 3.60E-03 | 8.18E-02 | POR      | -1.31 | 3.20E-03 | 7.86E-02 |
| CGRRF1   | 2.43 | 1.08E-02 | 1.16E-01 | MAP2K3   | -1.32 | 1.00E-04 | 4.06E-02 |
| MEIS1    | 2.42 | 7.30E-03 | 1.01E-01 | CDK2AP2  | -1.32 | 4.00E-04 | 5.16E-02 |
| GSTCD    | 2.41 | 6.30E-03 | 9.78E-02 | RNPEPL1  | -1.32 | 1.00E-03 | 6.09E-02 |
| USP51    | 2.41 | 1.06E-02 | 1.15E-01 | HCLS1    | -1.32 | 2.40E-03 | 7.14E-02 |
| ZNF521   | 2.39 | 1.60E-03 | 6.69E-02 | HLA.DQA1 | -1.32 | 7.10E-03 | 1.01E-01 |
| ATF7IP2  | 2.39 | 2.60E-03 | 7.32E-02 | FAM110A  | -1.32 | 9.70E-03 | 1.10E-01 |
| EPHX2    | 2.39 | 7.80E-03 | 1.04E-01 | UCP2     | -1.33 | 4.00E-04 | 5.16E-02 |
| ZNF614   | 2.39 | 7.90E-03 | 1.04E-01 | S1PR4    | -1.33 | 7.00E-04 | 5.85E-02 |
| ACTR6    | 2.38 | 2.10E-03 | 6.85E-02 | GNAI2    | -1.34 | 2.20E-03 | 7.02E-02 |
| FAM83D   | 2.38 | 6.70E-03 | 9.88E-02 | WAS      | -1.35 | 6.00E-04 | 5.80E-02 |
| MIER3    | 2.37 | 6.70E-03 | 9.88E-02 | SDF2L1   | -1.35 | 8.00E-04 | 5.85E-02 |
| SMO      | 2.37 | 8.00E-03 | 1.05E-01 | FAM65B   | -1.35 | 3.90E-03 | 8.43E-02 |
| CHRM3    | 2.37 | 1.06E-02 | 1.14E-01 | SLC38A10 | -1.37 | 1.00E-04 | 4.06E-02 |
| LRRC37B  | 2.36 | 5.30E-03 | 9.10E-02 | SLC9A1   | -1.37 | 2.00E-03 | 6.85E-02 |
| AASDH    | 2.36 | 6.30E-03 | 9.78E-02 | TSPAN14  | -1.38 | 4.00E-04 | 5.14E-02 |
| ZNF736   | 2.34 | 5.90E-03 | 9.41E-02 | GPX1     | -1.38 | 4.20E-03 | 8.70E-02 |
| ARHGAP18 | 2.32 | 5.50E-03 | 9.23E-02 | CYTH1    | -1.39 | 3.60E-03 | 8.18E-02 |
| SEC23A   | 2.3  | 7.40E-03 | 1.02E-01 | SP110    | -1.39 | 9.80E-03 | 1.11E-01 |
| CLGN     | 2.3  | 9.50E-03 | 1.10E-01 | HLA.C    | -1.39 | 1.12E-02 | 1.17E-01 |
| COG6     | 2.3  | 1.15E-02 | 1.19E-01 | CNPY3    | -1.4  | 2.00E-04 | 4.42E-02 |

|          |      |          |          |          |       |          |          |
|----------|------|----------|----------|----------|-------|----------|----------|
| UACA     | 2.28 | 6.00E-03 | 9.50E-02 | FGD3     | -1.4  | 2.50E-03 | 7.27E-02 |
| CLC      | 2.28 | 1.12E-02 | 1.17E-01 | PRKACA   | -1.4  | 2.70E-03 | 7.38E-02 |
| SERPINE2 | 2.26 | 4.00E-04 | 5.16E-02 | HLA.DRA  | -1.4  | 3.30E-03 | 7.86E-02 |
| TPD52    | 2.25 | 1.00E-03 | 6.18E-02 | TBC1D2   | -1.4  | 5.00E-03 | 8.94E-02 |
| TRIM59   | 2.25 | 2.10E-03 | 6.85E-02 | SEPT9    | -1.41 | 3.20E-03 | 7.79E-02 |
| ZNF880   | 2.23 | 4.40E-03 | 8.71E-02 | ARHGAP45 | -1.41 | 5.80E-03 | 9.36E-02 |
| MED21    | 2.23 | 8.80E-03 | 1.08E-01 | TTC7A    | -1.42 | 1.40E-03 | 6.53E-02 |
| PINLYP   | 2.23 | 9.10E-03 | 1.09E-01 | CST7     | -1.42 | 2.70E-03 | 7.38E-02 |
| ZSCAN9   | 2.22 | 5.90E-03 | 9.41E-02 | NEU1     | -1.43 | 1.60E-03 | 6.69E-02 |
| ZNF329   | 2.22 | 7.10E-03 | 1.01E-01 | REEP4    | -1.43 | 1.70E-03 | 6.73E-02 |
| TMX3     | 2.22 | 1.05E-02 | 1.14E-01 | ABR      | -1.43 | 4.30E-03 | 8.70E-02 |
| POLE2    | 2.21 | 2.30E-03 | 7.02E-02 | PXN      | -1.43 | 4.90E-03 | 8.89E-02 |
| TMEM237  | 2.21 | 3.50E-03 | 8.08E-02 | CYB561D2 | -1.43 | 7.40E-03 | 1.01E-01 |
| KIF27    | 2.21 | 1.02E-02 | 1.12E-01 | LPCAT1   | -1.43 | 1.01E-02 | 1.12E-01 |
| BBS9     | 2.2  | 9.70E-03 | 1.10E-01 | TMSB10   | -1.43 | 1.03E-02 | 1.13E-01 |
| ZBTB34   | 2.2  | 1.09E-02 | 1.16E-01 | SCO2     | -1.44 | 8.70E-03 | 1.08E-01 |
| IFT81    | 2.19 | 6.30E-03 | 9.76E-02 | ATP6V0B  | -1.44 | 1.11E-02 | 1.17E-01 |
| ZNF256   | 2.18 | 9.90E-03 | 1.11E-01 | RILPL2   | -1.45 | 5.50E-03 | 9.19E-02 |
| RCN2     | 2.17 | 1.15E-02 | 1.19E-01 | DOCK10   | -1.45 | 9.50E-03 | 1.10E-01 |
| MFN1     | 2.16 | 7.40E-03 | 1.01E-01 | AKAP13   | -1.45 | 9.70E-03 | 1.10E-01 |
| PIR      | 2.16 | 7.70E-03 | 1.04E-01 | PDXK     | -1.45 | 1.06E-02 | 1.15E-01 |
| LEPR     | 2.14 | 1.40E-03 | 6.53E-02 | MCOLN1   | -1.46 | 2.60E-03 | 7.32E-02 |
| GAN      | 2.14 | 4.90E-03 | 8.88E-02 | PKM      | -1.46 | 4.00E-03 | 8.50E-02 |
| C9orf85  | 2.14 | 6.70E-03 | 9.88E-02 | ROGDI    | -1.46 | 5.90E-03 | 9.41E-02 |
| METTL21B | 2.13 | 3.10E-03 | 7.79E-02 | RPS6KA4  | -1.47 | 3.00E-04 | 4.99E-02 |
| ABCC4    | 2.12 | 2.00E-04 | 4.61E-02 | LAPTM5   | -1.47 | 2.90E-03 | 7.60E-02 |
| STAT4    | 2.12 | 3.20E-03 | 7.79E-02 | GMIP     | -1.47 | 3.30E-03 | 7.89E-02 |
| ZNF711   | 2.11 | 3.50E-03 | 7.96E-02 | RCSD1    | -1.47 | 8.10E-03 | 1.05E-01 |
| NEDD4    | 2.11 | 4.90E-03 | 8.88E-02 | HS1BP3   | -1.48 | 1.70E-03 | 6.73E-02 |
| FHIT     | 2.11 | 1.14E-02 | 1.18E-01 | HOOK2    | -1.48 | 4.60E-03 | 8.76E-02 |
| NUP54    | 2.1  | 3.40E-03 | 7.92E-02 | MYD88    | -1.48 | 8.80E-03 | 1.08E-01 |
| IMPA1    | 2.1  | 9.20E-03 | 1.09E-01 | PREX1    | -1.49 | 3.00E-04 | 4.61E-02 |
| MTRF1L   | 2.1  | 1.02E-02 | 1.12E-01 | ANXA6    | -1.49 | 3.70E-03 | 8.18E-02 |
| ITGB3BP  | 2.09 | 6.10E-03 | 9.64E-02 | ABCD1    | -1.49 | 7.20E-03 | 1.01E-01 |
| SPATA7   | 2.08 | 2.30E-03 | 7.08E-02 | RNASET2  | -1.49 | 9.50E-03 | 1.10E-01 |
| VCPKMT   | 2.07 | 8.90E-03 | 1.08E-01 | ESRRA    | -1.5  | 2.00E-04 | 4.42E-02 |
| CCSAP    | 2.07 | 1.03E-02 | 1.12E-01 | C17orf62 | -1.5  | 1.90E-03 | 6.77E-02 |
| C2orf69  | 2.07 | 1.08E-02 | 1.16E-01 | OGFR     | -1.53 | 4.00E-04 | 5.14E-02 |
| TMOD1    | 2.06 | 4.00E-04 | 5.14E-02 | SH3BP1   | -1.53 | 3.90E-03 | 8.43E-02 |
| DYNLT3   | 2.06 | 1.13E-02 | 1.17E-01 | E2F2     | -1.53 | 4.50E-03 | 8.74E-02 |
| CEP97    | 2.05 | 4.30E-03 | 8.70E-02 | GOLGA3   | -1.53 | 4.80E-03 | 8.87E-02 |
| ZNF124   | 2.05 | 1.04E-02 | 1.13E-01 | GM2A     | -1.53 | 9.20E-03 | 1.10E-01 |
| LRRC40   | 2.02 | 6.80E-03 | 9.98E-02 | TEP1     | -1.53 | 9.60E-03 | 1.10E-01 |
| KCTD9    | 2.02 | 9.10E-03 | 1.09E-01 | TMEM8A   | -1.54 | 0.00E+00 | 4.06E-02 |
| RBM45    | 2.01 | 8.70E-03 | 1.08E-01 | TAP1     | -1.55 | 2.00E-04 | 4.61E-02 |
| BEX2     | 2.01 | 1.00E-02 | 1.12E-01 | ARAP1    | -1.56 | 2.00E-04 | 4.42E-02 |
| ZNF141   | 2    | 1.50E-03 | 6.65E-02 | RNH1     | -1.57 | 7.00E-04 | 5.85E-02 |
| MECOM    | 1.99 | 1.50E-03 | 6.62E-02 | IMPDH1   | -1.58 | 0.00E+00 | 4.06E-02 |
| SLAIN1   | 1.99 | 1.13E-02 | 1.17E-01 | RNF213   | -1.58 | 3.60E-03 | 8.18E-02 |
| BCKDHB   | 1.98 | 4.40E-03 | 8.74E-02 | IL4R     | -1.58 | 8.70E-03 | 1.08E-01 |
| PRPF18   | 1.98 | 1.10E-02 | 1.17E-01 | HLA.DRB1 | -1.59 | 1.80E-03 | 6.76E-02 |
| FGGY     | 1.96 | 9.30E-03 | 1.10E-01 | SMAP2    | -1.59 | 3.10E-03 | 7.79E-02 |
| TFPI     | 1.95 | 6.00E-04 | 5.80E-02 | NBEAL2   | -1.59 | 8.70E-03 | 1.08E-01 |
| TRUB1    | 1.95 | 8.50E-03 | 1.07E-01 | TOM1     | -1.59 | 9.30E-03 | 1.10E-01 |

|               |      |          |          |           |       |          |          |
|---------------|------|----------|----------|-----------|-------|----------|----------|
| CFAP97        | 1.94 | 1.00E-03 | 6.16E-02 | UNC119    | -1.6  | 1.50E-03 | 6.62E-02 |
| TTC26         | 1.94 | 5.90E-03 | 9.45E-02 | DTX2      | -1.61 | 1.20E-03 | 6.43E-02 |
| HACD1         | 1.93 | 2.90E-03 | 7.64E-02 | CCDC142   | -1.61 | 5.50E-03 | 9.21E-02 |
| MBIP          | 1.93 | 2.90E-03 | 7.64E-02 | MID1IP1   | -1.62 | 6.00E-04 | 5.80E-02 |
| MED12L        | 1.92 | 9.90E-03 | 1.11E-01 | ARRB2     | -1.62 | 4.70E-03 | 8.83E-02 |
| GATA2         | 1.92 | 1.10E-02 | 1.16E-01 | SH3BP2    | -1.62 | 6.40E-03 | 9.78E-02 |
| PEX1          | 1.91 | 8.80E-03 | 1.08E-01 | WARS      | -1.63 | 1.10E-03 | 6.35E-02 |
| BDH2          | 1.89 | 3.50E-03 | 8.09E-02 | ATP6V0D1  | -1.63 | 3.90E-03 | 8.42E-02 |
| <b>DLC1</b>   | 1.89 | 5.10E-03 | 9.01E-02 | TLE4      | -1.63 | 8.30E-03 | 1.06E-01 |
| RHOBTB1       | 1.89 | 5.80E-03 | 9.36E-02 | APOL1     | -1.63 | 1.08E-02 | 1.15E-01 |
| GPHN          | 1.89 | 7.30E-03 | 1.01E-01 | MGAT1     | -1.64 | 1.00E-04 | 4.42E-02 |
| CASD1         | 1.87 | 3.00E-04 | 5.12E-02 | HLA.B     | -1.64 | 1.20E-03 | 6.43E-02 |
| CCNT1         | 1.87 | 8.50E-03 | 1.07E-01 | ABTB1     | -1.64 | 2.00E-03 | 6.85E-02 |
| RIMKLB        | 1.87 | 9.10E-03 | 1.09E-01 | RAB11FIP1 | -1.64 | 4.70E-03 | 8.78E-02 |
| CNRIP1        | 1.86 | 1.90E-03 | 6.78E-02 | ARHGAP30  | -1.65 | 2.10E-03 | 6.86E-02 |
| TMEM64        | 1.86 | 2.20E-03 | 6.98E-02 | DEF8      | -1.65 | 2.20E-03 | 7.01E-02 |
| YEATS4        | 1.86 | 1.05E-02 | 1.14E-01 | C15orf39  | -1.67 | 1.00E-04 | 4.06E-02 |
| EOGT          | 1.85 | 9.70E-03 | 1.11E-01 | EMILIN2   | -1.68 | 4.70E-03 | 8.78E-02 |
| MAP9          | 1.84 | 7.10E-03 | 1.01E-01 | JMJD6     | -1.69 | 2.30E-03 | 7.13E-02 |
| NR1D2         | 1.84 | 8.00E-03 | 1.05E-01 | SLC35F6   | -1.69 | 4.10E-03 | 8.59E-02 |
| C12orf29      | 1.83 | 5.70E-03 | 9.29E-02 | HLA.A     | -1.71 | 1.20E-03 | 6.43E-02 |
| BMT2          | 1.83 | 9.60E-03 | 1.10E-01 | SP11      | -1.72 | 3.00E-03 | 7.76E-02 |
| ZNF551        | 1.83 | 1.12E-02 | 1.17E-01 | PECAM1    | -1.72 | 4.60E-03 | 8.76E-02 |
| PAWR          | 1.82 | 2.70E-03 | 7.38E-02 | BASP1     | -1.72 | 6.80E-03 | 9.95E-02 |
| MORC3         | 1.82 | 7.80E-03 | 1.04E-01 | TMEM175   | -1.74 | 1.40E-03 | 6.53E-02 |
| PARP11        | 1.81 | 6.00E-03 | 9.50E-02 | IL10RB    | -1.74 | 4.80E-03 | 8.88E-02 |
| PDZD8         | 1.8  | 2.40E-03 | 7.17E-02 | SAT2      | -1.74 | 5.00E-03 | 9.00E-02 |
| C2orf88       | 1.8  | 6.10E-03 | 9.64E-02 | NLRC5     | -1.74 | 7.10E-03 | 1.01E-01 |
| PGBD1         | 1.8  | 6.70E-03 | 9.90E-02 | ALDH3B1   | -1.74 | 8.40E-03 | 1.06E-01 |
| CENPK         | 1.8  | 9.90E-03 | 1.11E-01 | PYCARD    | -1.75 | 1.40E-03 | 6.48E-02 |
| ZNF765        | 1.79 | 7.30E-03 | 1.01E-01 | FAM50A    | -1.75 | 1.90E-03 | 6.76E-02 |
| MLLT3         | 1.78 | 0.00E+00 | 4.06E-02 | CD74      | -1.76 | 1.00E-04 | 4.06E-02 |
| ST8SIA6       | 1.78 | 1.30E-03 | 6.43E-02 | FBXO6     | -1.76 | 1.15E-02 | 1.19E-01 |
| SENP7         | 1.78 | 8.50E-03 | 1.07E-01 | IL16      | -1.77 | 2.50E-03 | 7.19E-02 |
| STK3          | 1.78 | 1.02E-02 | 1.12E-01 | ARPC1B    | -1.78 | 1.10E-03 | 6.39E-02 |
| ACADSB        | 1.77 | 6.90E-03 | 1.00E-01 | PARD6A    | -1.78 | 2.40E-03 | 7.14E-02 |
| PRKCI         | 1.72 | 1.70E-03 | 6.73E-02 | EHBP1L1   | -1.78 | 5.10E-03 | 9.01E-02 |
| CYYR1         | 1.72 | 6.90E-03 | 1.00E-01 | AP5B1     | -1.79 | 1.50E-03 | 6.62E-02 |
| RRAGB         | 1.71 | 7.70E-03 | 1.03E-01 | PQLC2     | -1.8  | 1.70E-03 | 6.73E-02 |
| ALDH1A1       | 1.71 | 8.30E-03 | 1.06E-01 | SH2D3C    | -1.81 | 1.80E-03 | 6.76E-02 |
| RABL2A        | 1.71 | 9.50E-03 | 1.10E-01 | SLC12A9   | -1.82 | 1.00E-04 | 4.42E-02 |
| DUS4L         | 1.7  | 1.06E-02 | 1.15E-01 | NAGA      | -1.82 | 3.70E-03 | 8.26E-02 |
| PDK1          | 1.69 | 6.90E-03 | 1.00E-01 | NUDT16    | -1.82 | 4.00E-03 | 8.47E-02 |
| TTC7B         | 1.68 | 8.00E-04 | 5.85E-02 | SH3BGRL3  | -1.82 | 6.00E-03 | 9.55E-02 |
| GSKIP         | 1.68 | 7.60E-03 | 1.03E-01 | EFHD2     | -1.84 | 6.00E-04 | 5.77E-02 |
| C1orf21       | 1.66 | 1.00E-03 | 6.16E-02 | TMSB4X    | -1.84 | 3.60E-03 | 8.18E-02 |
| BEX3          | 1.66 | 1.40E-03 | 6.48E-02 | ALDH2     | -1.84 | 4.20E-03 | 8.70E-02 |
| ACSM3         | 1.66 | 1.40E-03 | 6.53E-02 | TIMP2     | -1.84 | 5.00E-03 | 8.94E-02 |
| STXBP5        | 1.64 | 2.00E-04 | 4.61E-02 | HERPUD1   | -1.85 | 2.00E-03 | 6.85E-02 |
| MTURN         | 1.62 | 0.00E+00 | 4.06E-02 | CCDC88C   | -1.85 | 7.20E-03 | 1.01E-01 |
| ZNF43         | 1.61 | 3.00E-04 | 5.12E-02 | HDAC4     | -1.86 | 5.00E-04 | 5.64E-02 |
| RP11.382A20.3 | 1.6  | 3.80E-03 | 8.28E-02 | FTL       | -1.86 | 6.50E-03 | 9.78E-02 |
| PRKACB        | 1.6  | 4.50E-03 | 8.74E-02 | CCND3     | -1.88 | 0.00E+00 | 4.06E-02 |
| CDADC1        | 1.6  | 4.60E-03 | 8.76E-02 | SULT1A1   | -1.88 | 8.90E-03 | 1.08E-01 |

|         |      |          |          |          |       |          |          |
|---------|------|----------|----------|----------|-------|----------|----------|
| ORC3    | 1.6  | 1.11E-02 | 1.17E-01 | ADGRE5   | -1.89 | 3.10E-03 | 7.79E-02 |
| ZNF512  | 1.59 | 3.00E-04 | 4.61E-02 | CD53     | -1.91 | 9.00E-04 | 5.85E-02 |
| CSNK1G3 | 1.59 | 1.01E-02 | 1.12E-01 | S100A4   | -1.93 | 9.40E-03 | 1.10E-01 |
| CUL5    | 1.58 | 2.00E-04 | 4.42E-02 | SLC27A3  | -1.94 | 9.00E-04 | 5.88E-02 |
| MCTP2   | 1.58 | 8.00E-04 | 5.85E-02 | CD52     | -1.94 | 6.20E-03 | 9.72E-02 |
| CD2AP   | 1.56 | 1.40E-03 | 6.53E-02 | CITED4   | -1.96 | 6.00E-04 | 5.80E-02 |
| AGL     | 1.56 | 9.00E-03 | 1.09E-01 | AKNA     | -1.96 | 2.70E-03 | 7.38E-02 |
| CDK17   | 1.55 | 8.00E-04 | 5.85E-02 | SH2B2    | -1.96 | 1.16E-02 | 1.19E-01 |
| ARHGAP5 | 1.55 | 5.50E-03 | 9.23E-02 | MOB3A    | -1.97 | 2.00E-04 | 4.42E-02 |
| DEPTOR  | 1.55 | 6.60E-03 | 9.78E-02 | CTSA     | -1.97 | 3.00E-04 | 5.12E-02 |
| UFSP2   | 1.55 | 9.90E-03 | 1.11E-01 | CYBA     | -1.97 | 9.00E-04 | 5.85E-02 |
| HOMER2  | 1.54 | 0.00E+00 | 4.06E-02 | RGS19    | -1.98 | 7.00E-04 | 5.85E-02 |
| CKAP2   | 1.54 | 4.60E-03 | 8.78E-02 | SEMA4B   | -1.98 | 1.50E-03 | 6.62E-02 |
| TWSG1   | 1.54 | 4.70E-03 | 8.83E-02 | HLX      | -1.98 | 2.10E-03 | 6.85E-02 |
| IMMP2L  | 1.54 | 8.00E-03 | 1.05E-01 | ZDHH1    | -1.98 | 2.90E-03 | 7.60E-02 |
| EPSTI1  | 1.53 | 1.00E-04 | 4.06E-02 | TSC22D3  | -1.98 | 3.70E-03 | 8.24E-02 |
| GTDC1   | 1.53 | 3.90E-03 | 8.43E-02 | CACFD1   | -1.99 | 8.00E-04 | 5.85E-02 |
| LRBA    | 1.52 | 4.10E-03 | 8.55E-02 | TUBA4A   | -1.99 | 1.30E-03 | 6.44E-02 |
| PHF6    | 1.52 | 5.30E-03 | 9.10E-02 | LTB4R    | -1.99 | 5.10E-03 | 9.01E-02 |
| N4BP2   | 1.51 | 8.00E-04 | 5.85E-02 | ARHGAP27 | -2.02 | 6.00E-04 | 5.80E-02 |
| DNAJB14 | 1.5  | 1.90E-03 | 6.76E-02 | BRI3     | -2.02 | 3.90E-03 | 8.43E-02 |
| ERMP1   | 1.5  | 7.20E-03 | 1.01E-01 | SPON2    | -2.03 | 3.60E-03 | 8.18E-02 |
| ASB9    | 1.49 | 2.90E-03 | 7.64E-02 | CORO1A   | -2.06 | 1.00E-04 | 4.16E-02 |
| STAP1   | 1.48 | 3.20E-03 | 7.79E-02 | SCPEP1   | -2.06 | 1.02E-02 | 1.12E-01 |
| NCK1    | 1.46 | 4.80E-03 | 8.88E-02 | GRINA    | -2.08 | 2.00E-04 | 4.61E-02 |
| HOXA9   | 1.45 | 1.70E-03 | 6.73E-02 | GAA      | -2.08 | 1.10E-03 | 6.33E-02 |
| STAM    | 1.45 | 5.30E-03 | 9.10E-02 | MVP      | -2.08 | 2.50E-03 | 7.24E-02 |
| KIF2A   | 1.45 | 5.80E-03 | 9.36E-02 | ZFHX3    | -2.08 | 4.50E-03 | 8.74E-02 |
| CDK6    | 1.44 | 9.40E-03 | 1.10E-01 | BTG1     | -2.09 | 1.70E-03 | 6.73E-02 |
| BIVM    | 1.42 | 2.90E-03 | 7.64E-02 | CFD      | -2.09 | 6.60E-03 | 9.78E-02 |
| FAM92A  | 1.42 | 4.50E-03 | 8.76E-02 | KIAA0930 | -2.1  | 0.00E+00 | 4.06E-02 |
| TTC8    | 1.42 | 7.60E-03 | 1.03E-01 | IQSEC1   | -2.1  | 2.00E-04 | 4.42E-02 |
| NET1    | 1.41 | 1.00E-04 | 4.06E-02 | PLXNB2   | -2.11 | 1.40E-03 | 6.48E-02 |
| STRADB  | 1.41 | 2.00E-04 | 4.42E-02 | HCST     | -2.11 | 2.70E-03 | 7.38E-02 |
| PRKAR2B | 1.41 | 3.00E-04 | 4.98E-02 | PITPNM1  | -2.11 | 8.40E-03 | 1.07E-01 |
| ZNF33B  | 1.41 | 8.00E-04 | 5.85E-02 | HLA.DMB  | -2.12 | 1.00E-03 | 6.09E-02 |
| LRRCC1  | 1.4  | 3.90E-03 | 8.43E-02 | S100A6   | -2.12 | 7.60E-03 | 1.03E-01 |
| PEX13   | 1.4  | 9.80E-03 | 1.11E-01 | SEMA4A   | -2.14 | 4.00E-04 | 5.14E-02 |
| FAIM    | 1.39 | 7.70E-03 | 1.03E-01 | FCGRT    | -2.14 | 8.00E-04 | 5.85E-02 |
| RICTOR  | 1.39 | 8.90E-03 | 1.08E-01 | IRF7     | -2.14 | 4.30E-03 | 8.70E-02 |
| DDHD2   | 1.38 | 1.00E-04 | 4.42E-02 | ITPRIP   | -2.15 | 8.00E-04 | 5.85E-02 |
| CCNG1   | 1.38 | 6.50E-03 | 9.78E-02 | GBP2     | -2.15 | 9.70E-03 | 1.11E-01 |
| ORC4    | 1.37 | 2.00E-04 | 4.61E-02 | TSPO     | -2.16 | 2.00E-04 | 4.42E-02 |
| MNAT1   | 1.37 | 1.00E-03 | 6.23E-02 | CAPG     | -2.16 | 1.20E-03 | 6.43E-02 |
| IFT74   | 1.37 | 1.50E-03 | 6.62E-02 | MAST3    | -2.16 | 3.20E-03 | 7.79E-02 |
| ZNF664  | 1.37 | 3.10E-03 | 7.79E-02 | CCDC88B  | -2.16 | 8.10E-03 | 1.05E-01 |
| ABCD3   | 1.37 | 5.60E-03 | 9.23E-02 | GLIPR2   | -2.17 | 6.30E-03 | 9.75E-02 |
| GCF2    | 1.36 | 1.90E-03 | 6.76E-02 | CDKN2D   | -2.18 | 4.50E-03 | 8.76E-02 |
| PRKD3   | 1.36 | 2.40E-03 | 7.18E-02 | VAV2     | -2.19 | 2.40E-03 | 7.18E-02 |
| TOX     | 1.36 | 4.50E-03 | 8.74E-02 | CDC42EP2 | -2.22 | 1.70E-03 | 6.73E-02 |
| PIIP5K1 | 1.36 | 8.00E-03 | 1.05E-01 | RXRA     | -2.23 | 1.00E-03 | 6.16E-02 |
| LANCL1  | 1.36 | 1.10E-02 | 1.16E-01 | NFKBIZ   | -2.23 | 3.10E-03 | 7.79E-02 |
| NT5C3A  | 1.35 | 5.00E-04 | 5.74E-02 | CTSB     | -2.24 | 4.00E-04 | 5.16E-02 |
| MMS22L  | 1.35 | 3.40E-03 | 7.92E-02 | CXCR4    | -2.24 | 3.30E-03 | 7.86E-02 |

|          |      |          |          |          |       |          |          |
|----------|------|----------|----------|----------|-------|----------|----------|
| FER      | 1.35 | 6.40E-03 | 9.78E-02 | AGTRAP   | -2.26 | 5.00E-04 | 5.64E-02 |
| APOOL    | 1.35 | 6.90E-03 | 1.00E-01 | KLF6     | -2.26 | 2.50E-03 | 7.27E-02 |
| NEDD4L   | 1.35 | 7.80E-03 | 1.04E-01 | IL6R     | -2.27 | 1.60E-03 | 6.73E-02 |
| ZRANB2   | 1.35 | 8.10E-03 | 1.05E-01 | TAGAP    | -2.27 | 8.30E-03 | 1.06E-01 |
| NLK      | 1.34 | 1.00E-04 | 4.06E-02 | TRPM2    | -2.28 | 9.00E-04 | 5.88E-02 |
| SCAI     | 1.34 | 1.70E-03 | 6.73E-02 | DDIT4    | -2.28 | 7.00E-03 | 1.01E-01 |
| SMAD5    | 1.34 | 8.80E-03 | 1.08E-01 | LSP1     | -2.29 | 1.00E-03 | 6.09E-02 |
| ATP6V0A2 | 1.33 | 1.00E-04 | 4.42E-02 | CD72     | -2.29 | 1.30E-03 | 6.43E-02 |
| SLC35A3  | 1.33 | 4.00E-04 | 5.14E-02 | SELPLG   | -2.3  | 1.40E-03 | 6.48E-02 |
| CBR4     | 1.33 | 1.01E-02 | 1.12E-01 | IER2     | -2.31 | 5.40E-03 | 9.11E-02 |
| TTC37    | 1.31 | 3.80E-03 | 8.28E-02 | TCIRG1   | -2.32 | 2.40E-03 | 7.14E-02 |
| AMT      | 1.31 | 4.80E-03 | 8.88E-02 | SLC43A2  | -2.36 | 6.50E-03 | 9.78E-02 |
| KLHDC2   | 1.3  | 7.00E-04 | 5.85E-02 | PRKCD    | -2.37 | 3.00E-04 | 4.61E-02 |
| RC3H2    | 1.3  | 1.50E-03 | 6.62E-02 | CTSD     | -2.38 | 1.20E-03 | 6.43E-02 |
| EXOC6    | 1.29 | 7.00E-04 | 5.85E-02 | IRS2     | -2.38 | 2.00E-03 | 6.85E-02 |
| ATP2C1   | 1.29 | 1.20E-03 | 6.43E-02 | CTSZ     | -2.38 | 3.70E-03 | 8.24E-02 |
| HBS1L    | 1.28 | 4.00E-04 | 5.14E-02 | IFI27L2  | -2.4  | 1.70E-03 | 6.73E-02 |
| ICA1     | 1.28 | 5.00E-04 | 5.25E-02 | P2RX7    | -2.4  | 5.30E-03 | 9.10E-02 |
| HNRNPLL  | 1.28 | 8.00E-04 | 5.85E-02 | C1orf162 | -2.4  | 6.50E-03 | 9.78E-02 |
| SLC39A8  | 1.28 | 4.00E-03 | 8.47E-02 | PSAP     | -2.41 | 1.50E-03 | 6.65E-02 |
| SCD      | 1.28 | 8.90E-03 | 1.08E-01 | MILR1    | -2.42 | 2.60E-03 | 7.32E-02 |
| DZIP3    | 1.27 | 1.50E-03 | 6.62E-02 | COTL1    | -2.42 | 4.30E-03 | 8.70E-02 |
| COX11    | 1.27 | 1.80E-03 | 6.73E-02 | CD79A    | -2.43 | 4.10E-03 | 8.57E-02 |
| TRAPPC6B | 1.27 | 4.90E-03 | 8.88E-02 | MYO1F    | -2.44 | 4.00E-04 | 5.16E-02 |
| PPM1A    | 1.26 | 4.30E-03 | 8.70E-02 | CYSTM1   | -2.45 | 6.40E-03 | 9.78E-02 |
| ZFAND1   | 1.26 | 5.60E-03 | 9.23E-02 | IRF8     | -2.46 | 3.40E-03 | 7.92E-02 |
| MAP4K5   | 1.26 | 5.70E-03 | 9.31E-02 | HRH2     | -2.46 | 7.00E-03 | 1.01E-01 |
| HLCS     | 1.26 | 9.10E-03 | 1.09E-01 | DUSP5    | -2.47 | 8.00E-03 | 1.05E-01 |
| PPIL4    | 1.25 | 1.20E-03 | 6.43E-02 | CYTH4    | -2.49 | 2.10E-03 | 6.85E-02 |
| ZNF22    | 1.25 | 2.00E-03 | 6.85E-02 | HLA.F    | -2.49 | 2.50E-03 | 7.24E-02 |
| KIFAP3   | 1.25 | 5.30E-03 | 9.11E-02 | ARL4C    | -2.49 | 4.40E-03 | 8.71E-02 |
| PUS7L    | 1.25 | 8.30E-03 | 1.06E-01 | PSTPIP1  | -2.49 | 7.10E-03 | 1.01E-01 |
| PKIG     | 1.25 | 9.50E-03 | 1.10E-01 | HIVEP3   | -2.49 | 8.70E-03 | 1.08E-01 |
| DOCK7    | 1.24 | 4.60E-03 | 8.76E-02 | JUNB     | -2.49 | 9.10E-03 | 1.09E-01 |
| CCND2    | 1.24 | 7.10E-03 | 1.01E-01 | UNC93B1  | -2.5  | 4.00E-04 | 5.14E-02 |
| LRPPRC   | 1.23 | 2.00E-04 | 4.42E-02 | B3GALT4  | -2.51 | 5.90E-03 | 9.44E-02 |
| DHX40    | 1.22 | 8.00E-04 | 5.85E-02 | ASGR1    | -2.51 | 1.07E-02 | 1.15E-01 |
| C11orf1  | 1.22 | 4.10E-03 | 8.50E-02 | FYB      | -2.52 | 6.30E-03 | 9.76E-02 |
| TOP2B    | 1.22 | 7.50E-03 | 1.03E-01 | NKG7     | -2.52 | 8.40E-03 | 1.06E-01 |
| PFDN4    | 1.22 | 9.50E-03 | 1.10E-01 | RNASE6   | -2.54 | 4.00E-03 | 8.43E-02 |
| STAT5A   | 1.21 | 6.00E-04 | 5.80E-02 | ADAP1    | -2.54 | 9.20E-03 | 1.09E-01 |
| ABCE1    | 1.21 | 1.30E-03 | 6.43E-02 | ITGAL    | -2.55 | 1.00E-04 | 4.42E-02 |
| CAPRIN1  | 1.21 | 2.40E-03 | 7.14E-02 | AHNAK    | -2.55 | 1.00E-03 | 6.16E-02 |
| TTC21B   | 1.21 | 9.50E-03 | 1.10E-01 | FOS      | -2.57 | 5.70E-03 | 9.34E-02 |
| AK3      | 1.2  | 9.00E-04 | 6.02E-02 | GRK5     | -2.63 | 3.10E-03 | 7.79E-02 |
| CDC7     | 1.2  | 1.80E-03 | 6.73E-02 | ANXA2    | -2.66 | 1.90E-03 | 6.78E-02 |
| RAVER2   | 1.2  | 1.90E-03 | 6.76E-02 | BTG2     | -2.67 | 1.10E-03 | 6.38E-02 |
| CGGBP1   | 1.2  | 2.00E-03 | 6.84E-02 | SLC16A3  | -2.67 | 3.10E-03 | 7.79E-02 |
| HAUS6    | 1.19 | 3.10E-03 | 7.79E-02 | RAB31    | -2.7  | 1.09E-02 | 1.16E-01 |
| TFDP2    | 1.19 | 4.70E-03 | 8.78E-02 | JUN      | -2.71 | 3.60E-03 | 8.18E-02 |
| TIA1     | 1.19 | 6.90E-03 | 1.00E-01 | NINJ1    | -2.71 | 4.50E-03 | 8.76E-02 |
| TRIM58   | 1.19 | 1.10E-02 | 1.17E-01 | LGALS1   | -2.72 | 1.00E-03 | 6.16E-02 |
| PM20D2   | 1.18 | 1.10E-02 | 1.17E-01 | CTSS     | -2.72 | 9.20E-03 | 1.09E-01 |
| XPOT     | 1.17 | 5.00E-04 | 5.64E-02 | CD22     | -2.72 | 9.90E-03 | 1.11E-01 |

|          |      |          |          |             |       |          |          |
|----------|------|----------|----------|-------------|-------|----------|----------|
| ZFAND6   | 1.16 | 4.70E-03 | 8.78E-02 | RHOB        | -2.77 | 3.90E-03 | 8.43E-02 |
| CCNB1IP1 | 1.16 | 1.03E-02 | 1.12E-01 | LILRA2      | -2.77 | 5.40E-03 | 9.17E-02 |
| KCTD3    | 1.15 | 2.40E-03 | 7.14E-02 | NAGK        | -2.78 | 3.00E-04 | 5.12E-02 |
| OPA1     | 1.15 | 5.70E-03 | 9.31E-02 | ITGB2       | -2.78 | 5.00E-04 | 5.64E-02 |
| TAF2     | 1.15 | 1.09E-02 | 1.16E-01 | IL17RA      | -2.81 | 4.00E-04 | 5.14E-02 |
| BEX4     | 1.14 | 6.00E-04 | 5.80E-02 | CST3        | -2.82 | 2.00E-04 | 4.42E-02 |
| TIPRL    | 1.14 | 7.00E-04 | 5.85E-02 | DUSP1       | -2.84 | 1.70E-03 | 6.73E-02 |
| CCNC     | 1.14 | 3.20E-03 | 7.79E-02 | TNFAIP2     | -2.84 | 1.07E-02 | 1.15E-01 |
| GTF3C3   | 1.14 | 5.10E-03 | 9.01E-02 | NFKBIA      | -2.85 | 7.70E-03 | 1.04E-01 |
| IFT88    | 1.14 | 5.10E-03 | 9.01E-02 | DUSP2       | -2.85 | 7.90E-03 | 1.05E-01 |
| WDR48    | 1.13 | 6.00E-04 | 5.80E-02 | CKAP4       | -2.86 | 8.80E-03 | 1.08E-01 |
| KLHL5    | 1.13 | 1.70E-03 | 6.73E-02 | SH3TC1      | -2.89 | 6.00E-04 | 5.80E-02 |
| PIK3R1   | 1.13 | 4.60E-03 | 8.78E-02 | MSRB1       | -2.93 | 1.90E-03 | 6.78E-02 |
| NME7     | 1.13 | 6.60E-03 | 9.78E-02 | CSF1R       | -2.93 | 3.10E-03 | 7.79E-02 |
| IPO5     | 1.12 | 1.70E-03 | 6.73E-02 | GRN         | -2.96 | 2.00E-04 | 4.61E-02 |
| BRWD1    | 1.12 | 1.70E-03 | 6.73E-02 | CEBPB       | -2.96 | 1.50E-03 | 6.65E-02 |
| CEP57    | 1.12 | 2.30E-03 | 7.13E-02 | PLK3        | -2.96 | 1.90E-03 | 6.76E-02 |
| NPM1     | 1.12 | 3.40E-03 | 7.92E-02 | LTB         | -2.99 | 2.50E-03 | 7.19E-02 |
| LMAN1    | 1.12 | 4.30E-03 | 8.70E-02 | ST14        | -2.99 | 1.06E-02 | 1.15E-01 |
| MTMR2    | 1.12 | 8.30E-03 | 1.06E-01 | IGF2R       | -3.01 | 1.10E-03 | 6.33E-02 |
| PDCD4    | 1.11 | 2.00E-04 | 4.61E-02 | CECR1       | -3.02 | 2.00E-03 | 6.85E-02 |
| OXCT1    | 1.11 | 5.20E-03 | 9.10E-02 | RGS2        | -3.02 | 4.40E-03 | 8.73E-02 |
| SEPT11   | 1.11 | 6.50E-03 | 9.78E-02 | RHBDF2      | -3.04 | 4.00E-04 | 5.14E-02 |
| KRR1     | 1.11 | 6.70E-03 | 9.88E-02 | NLRP3       | -3.06 | 6.80E-03 | 9.92E-02 |
| IREB2    | 1.1  | 6.00E-04 | 5.80E-02 | SAMHD1      | -3.08 | 1.60E-03 | 6.66E-02 |
| NUDT4    | 1.1  | 3.30E-03 | 7.86E-02 | HVCN1       | -3.08 | 3.30E-03 | 7.86E-02 |
| TRIM24   | 1.1  | 4.10E-03 | 8.50E-02 | APOBR       | -3.13 | 1.30E-03 | 6.43E-02 |
| SLC30A9  | 1.1  | 4.30E-03 | 8.70E-02 | CFP         | -3.15 | 3.00E-03 | 7.76E-02 |
| TPM1     | 1.1  | 4.40E-03 | 8.70E-02 | POU2F2      | -3.26 | 1.30E-03 | 6.48E-02 |
| RBMXL1   | 1.09 | 1.20E-03 | 6.43E-02 | BCL6        | -3.28 | 8.30E-03 | 1.06E-01 |
| CDC27    | 1.09 | 2.30E-03 | 7.02E-02 | ID2         | -3.29 | 3.30E-03 | 7.86E-02 |
| TBL1XR1  | 1.09 | 3.20E-03 | 7.79E-02 | TNFAIP3     | -3.29 | 4.30E-03 | 8.70E-02 |
| MBOAT2   | 1.08 | 2.70E-03 | 7.38E-02 | PLAUR       | -3.38 | 7.30E-03 | 1.01E-01 |
| TOMM70   | 1.08 | 2.90E-03 | 7.64E-02 | ZFP36       | -3.4  | 1.40E-03 | 6.48E-02 |
| ABI2     | 1.07 | 3.70E-03 | 8.18E-02 | S100A11     | -3.42 | 5.60E-03 | 9.23E-02 |
| HIBCH    | 1.07 | 5.40E-03 | 9.11E-02 | KLF4        | -3.42 | 6.40E-03 | 9.78E-02 |
| DLD      | 1.07 | 5.70E-03 | 9.29E-02 | C10orf54    | -3.46 | 3.00E-04 | 5.14E-02 |
| HS2ST1   | 1.07 | 9.50E-03 | 1.10E-01 | JAML        | -3.51 | 2.10E-03 | 6.85E-02 |
| RABL3    | 1.07 | 9.60E-03 | 1.10E-01 | TYROBP      | -3.56 | 6.50E-03 | 9.78E-02 |
| TIMM10B  | 1.06 | 5.50E-03 | 9.21E-02 | EGR1        | -3.59 | 3.10E-03 | 7.79E-02 |
| SNRNP48  | 1.06 | 5.70E-03 | 9.33E-02 | SLC2A6      | -3.63 | 3.30E-03 | 7.86E-02 |
| RBM7     | 1.06 | 6.60E-03 | 9.78E-02 | CEBPD       | -3.82 | 8.00E-04 | 5.85E-02 |
| SMIM8    | 1.06 | 8.10E-03 | 1.05E-01 | TNFRSF1B    | -3.9  | 2.00E-04 | 4.61E-02 |
| FUBP1    | 1.05 | 1.20E-03 | 6.43E-02 | LILRB2      | -3.91 | 7.40E-03 | 1.01E-01 |
| RMND5A   | 1.05 | 2.90E-03 | 7.64E-02 | KLF2        | -4.06 | 2.00E-04 | 4.61E-02 |
| USP33    | 1.05 | 4.30E-03 | 8.70E-02 | LILRB4      | -4.06 | 6.20E-03 | 9.72E-02 |
| CCDC58   | 1.05 | 5.60E-03 | 9.26E-02 | LYZ         | -4.08 | 2.70E-03 | 7.40E-02 |
| FAM98B   | 1.05 | 9.30E-03 | 1.10E-01 | HCK         | -4.08 | 5.10E-03 | 9.01E-02 |
| TTC19    | 1.04 | 1.00E-04 | 4.16E-02 | FAM20C      | -4.12 | 2.00E-03 | 6.85E-02 |
| RAD17    | 1.04 | 3.40E-03 | 7.92E-02 | TYMP        | -4.16 | 6.90E-03 | 1.00E-01 |
| TNPO1    | 1.03 | 1.70E-03 | 6.73E-02 | <b>CYBB</b> | -4.42 | 7.70E-03 | 1.03E-01 |
| DDX1     | 1.03 | 4.30E-03 | 8.70E-02 | FGR         | -4.47 | 1.08E-02 | 1.16E-01 |
| UBLCP1   | 1.03 | 9.50E-03 | 1.10E-01 | CTSH        | -4.51 | 4.40E-03 | 8.70E-02 |
| TYW3     | 1.02 | 1.80E-03 | 6.76E-02 | <b>NCF1</b> | -4.57 | 7.60E-03 | 1.03E-01 |

|        |      |          |          |               |       |          |          |
|--------|------|----------|----------|---------------|-------|----------|----------|
| CHD1L  | 1.02 | 3.30E-03 | 7.86E-02 | MPEG1         | -4.65 | 5.90E-03 | 9.41E-02 |
| NUDT21 | 1.02 | 3.90E-03 | 8.43E-02 | PLEC          | -4.75 | 1.00E-04 | 4.42E-02 |
| COQ8A  | 1.02 | 5.20E-03 | 9.08E-02 | FCN1          | -5.95 | 2.50E-03 | 7.27E-02 |
| ZC3H8  | 1.02 | 9.10E-03 | 1.09E-01 | LRP1          | -6.18 | 4.70E-03 | 8.78E-02 |
| HIGD1A | 1.02 | 9.70E-03 | 1.10E-01 | S100A9        | -6.95 | 4.00E-04 | 5.14E-02 |
| CTPS2  | 1.01 | 2.00E-03 | 6.84E-02 | <b>S100A8</b> | -7.1  | 1.20E-03 | 6.43E-02 |
| ZNF639 | 1.01 | 7.00E-03 | 1.00E-01 |               |       |          |          |
| CFAP36 | 1.01 | 7.00E-03 | 1.01E-01 |               |       |          |          |
| IP6K2  | 1.01 | 1.02E-02 | 1.12E-01 |               |       |          |          |

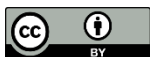

Supplement: s1 [file s1]
